# Supplementary material for: Oxidant-free, three-component synthesis of 7-amino-6H-benzo[c]chromen-6-ones under green conditions
Source: Royal Society of Chemistry journal article supplement (doi:10.1039/c9ra07108c), 2019-01-01

**Oxidant-free, three-component synthesis of 7-amino-6*H*-benzo[*c*]chromen-6-ones under green conditions**

*B. S. Vachan, Aishwarya Ramesh, Muthu Karuppasamy, Isravel Muthukrishnan, Subbiah Nagarajan, J. Carlos Menéndez, C. Uma Maheswari,\* and Vellaisamy Sridharan,\**

**Supporting Information**

<sup>1</sup>H and <sup>13</sup>C NMR Spectra

# $^1\text{H}$ and $^{13}\text{C}$ NMR Spectra

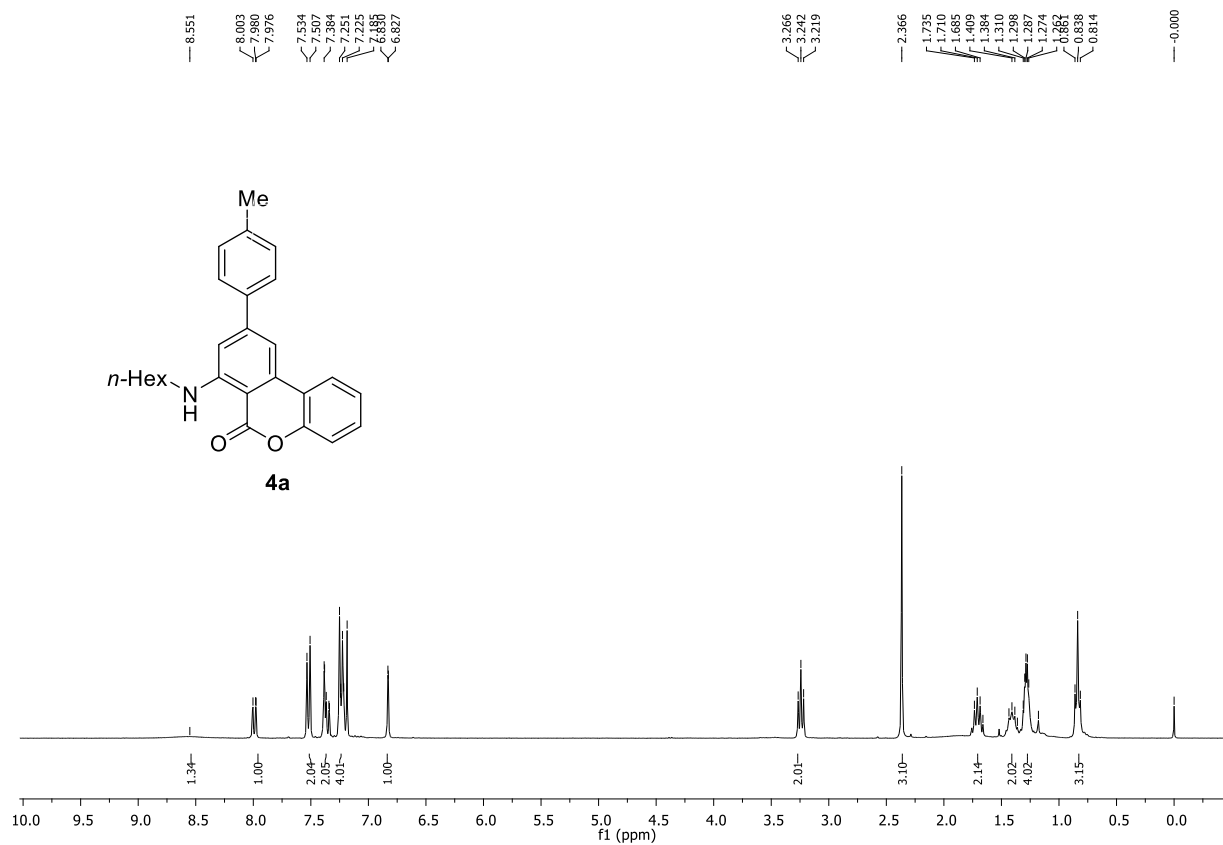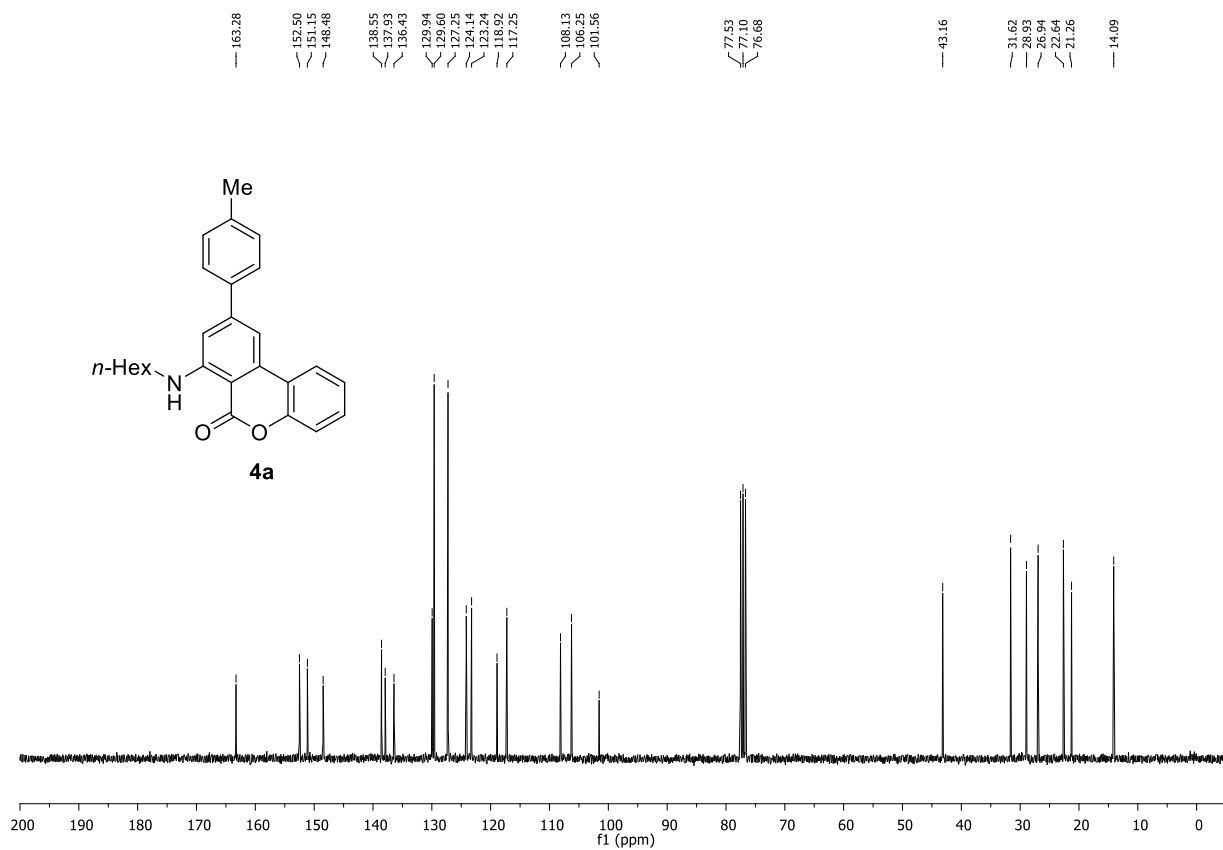

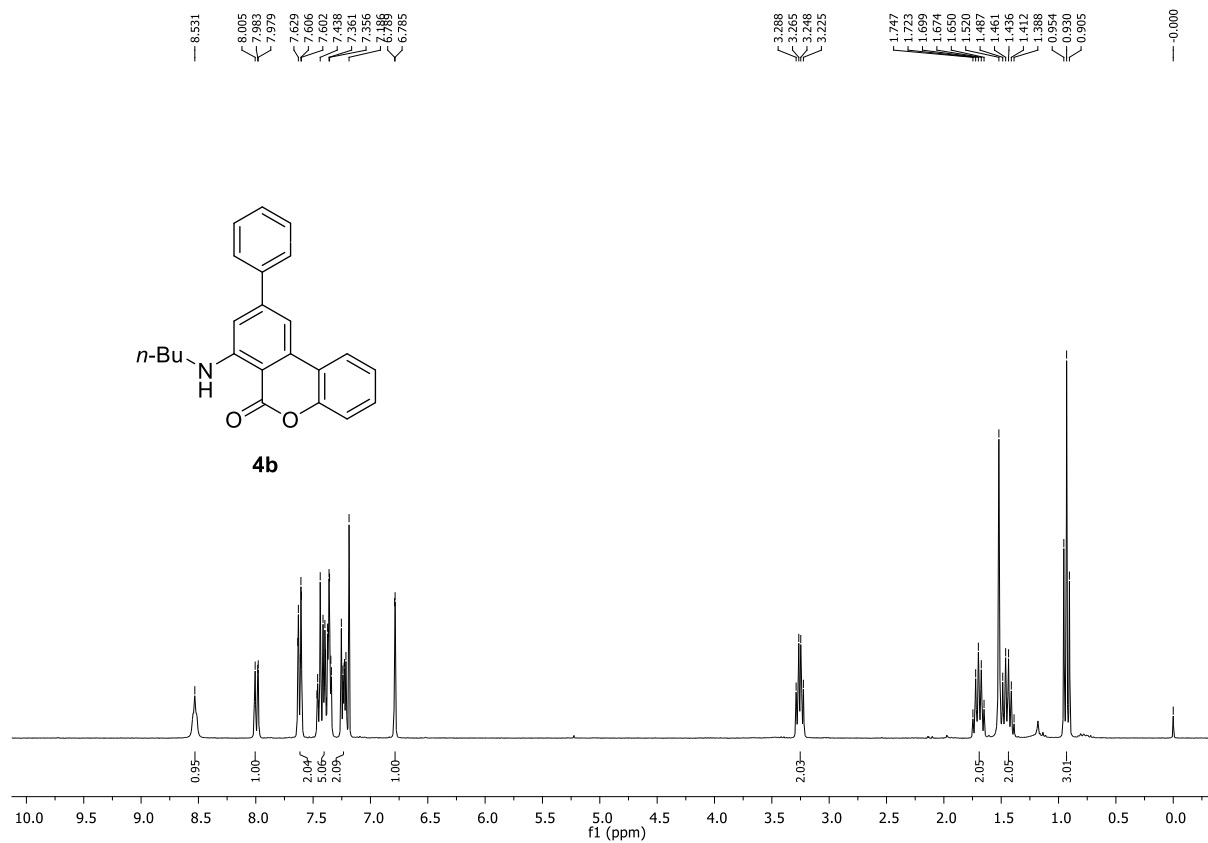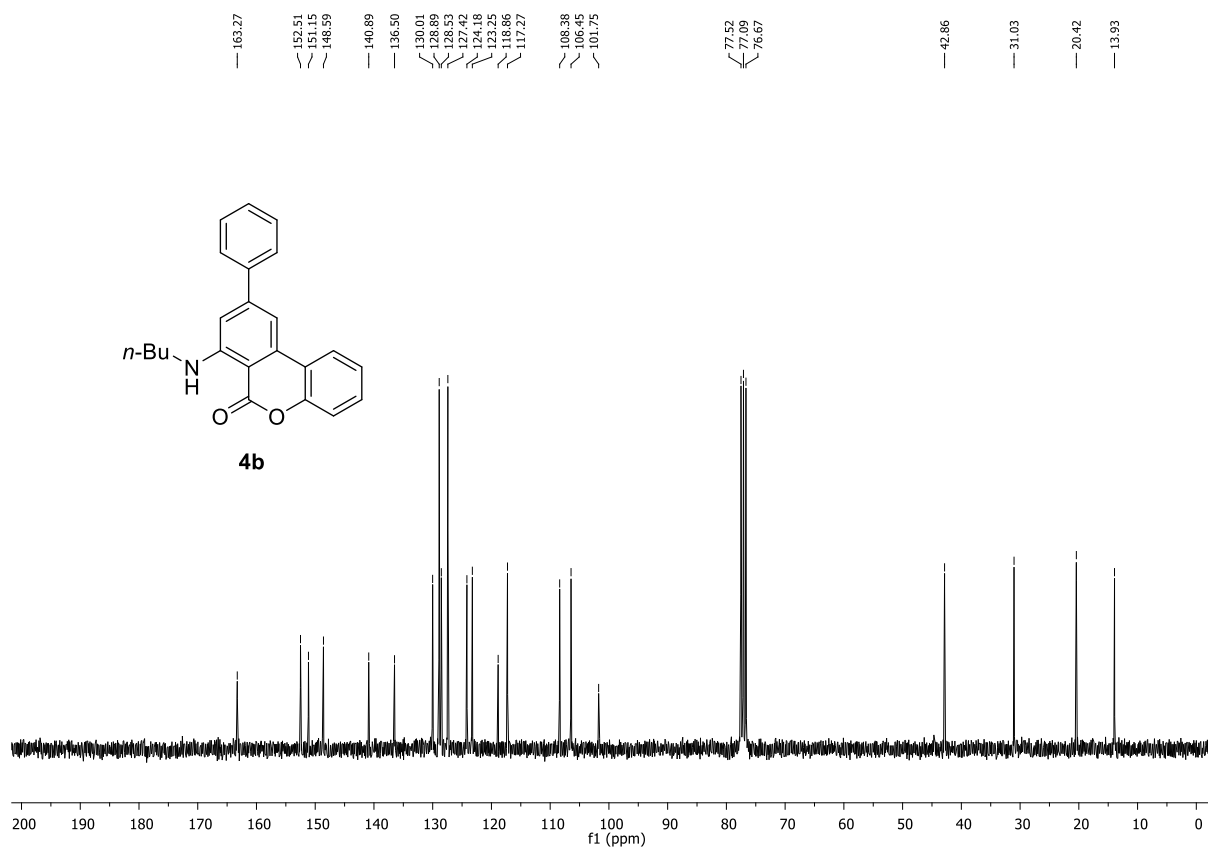

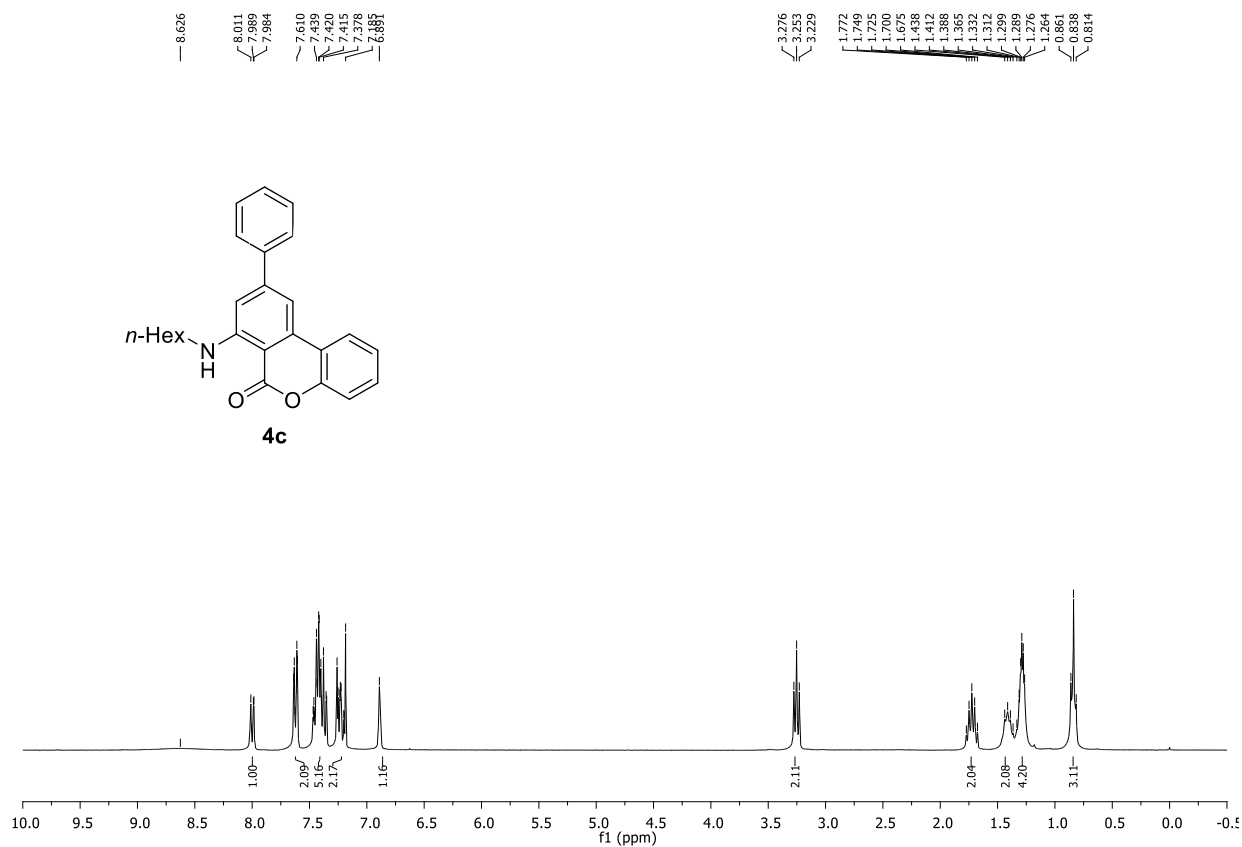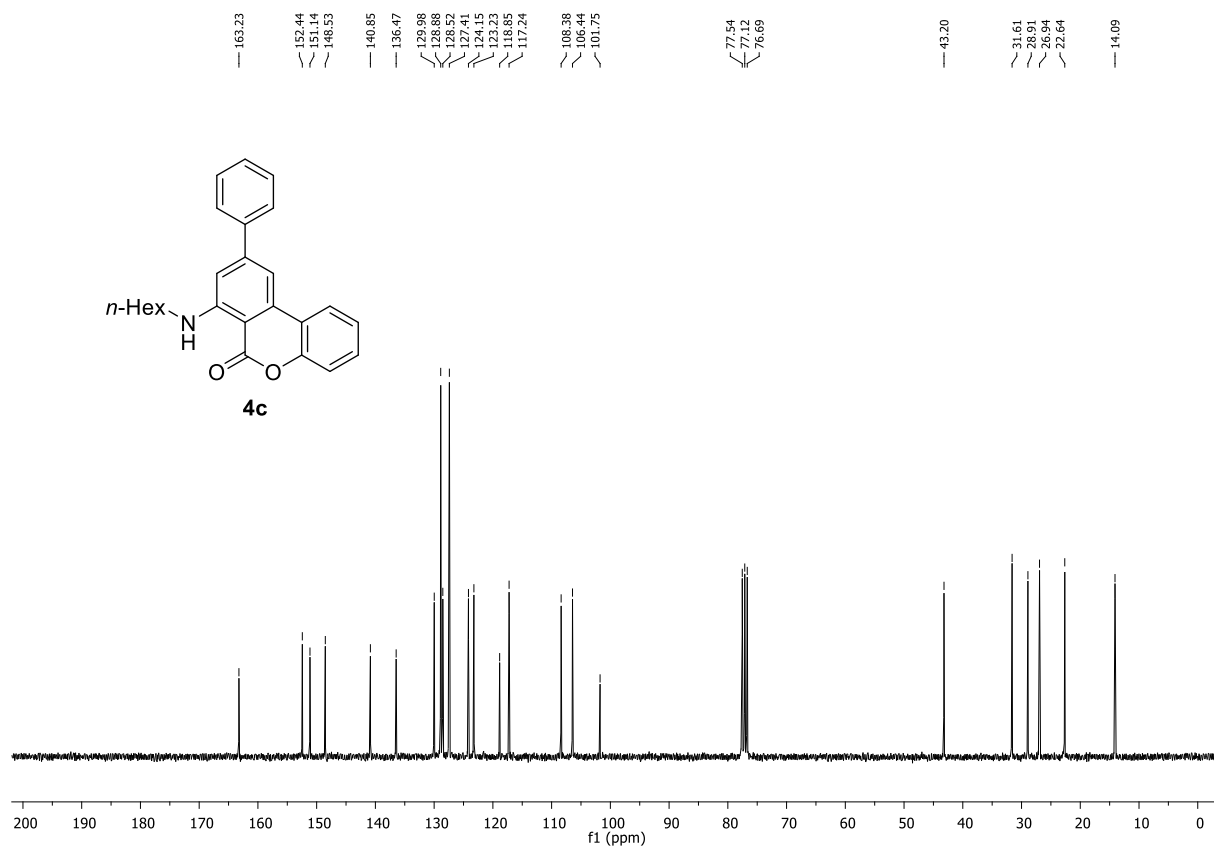

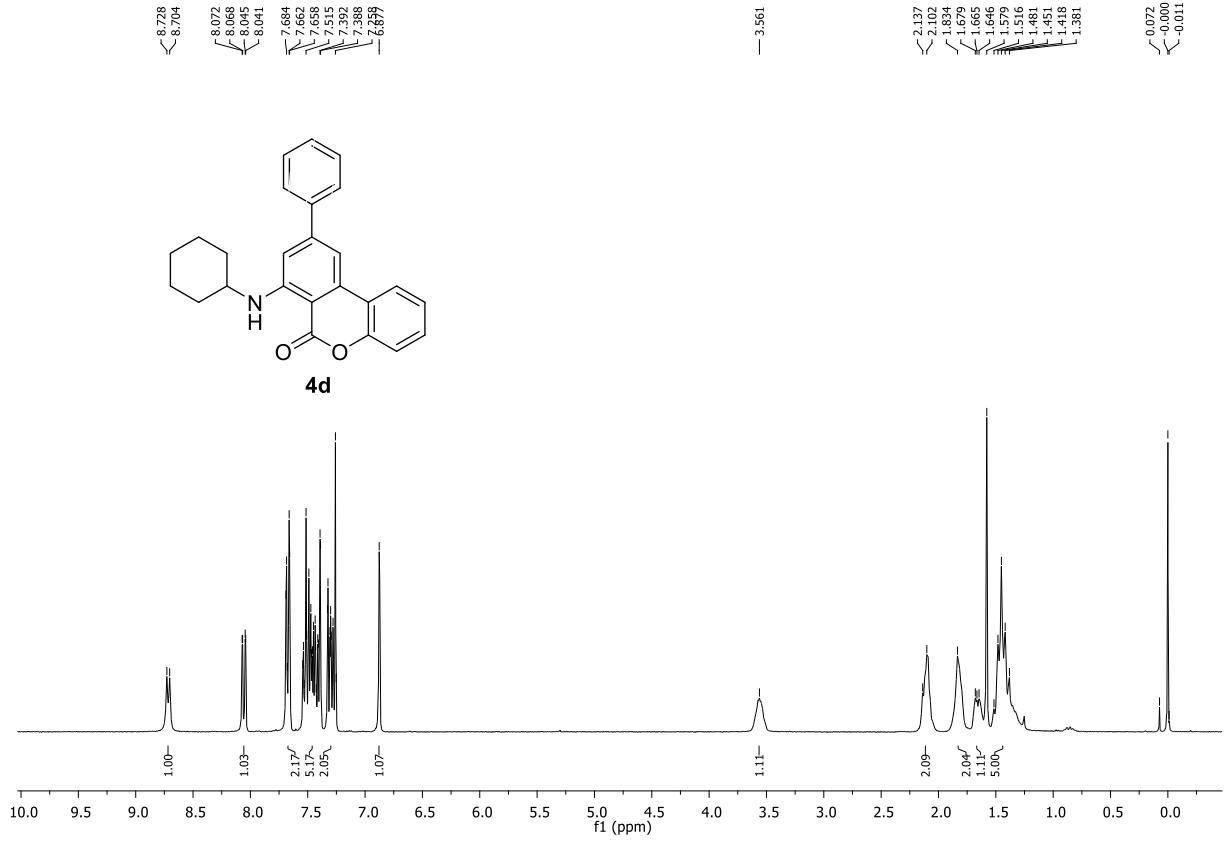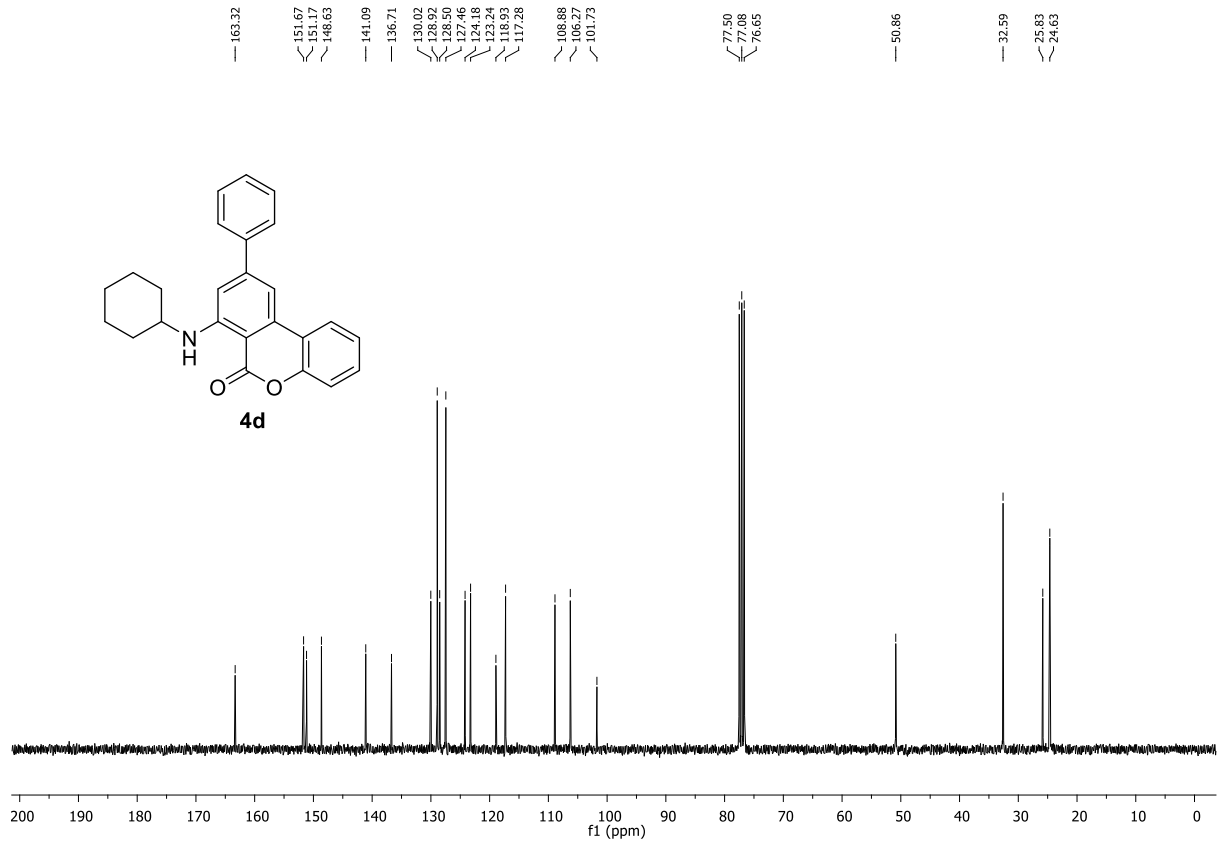

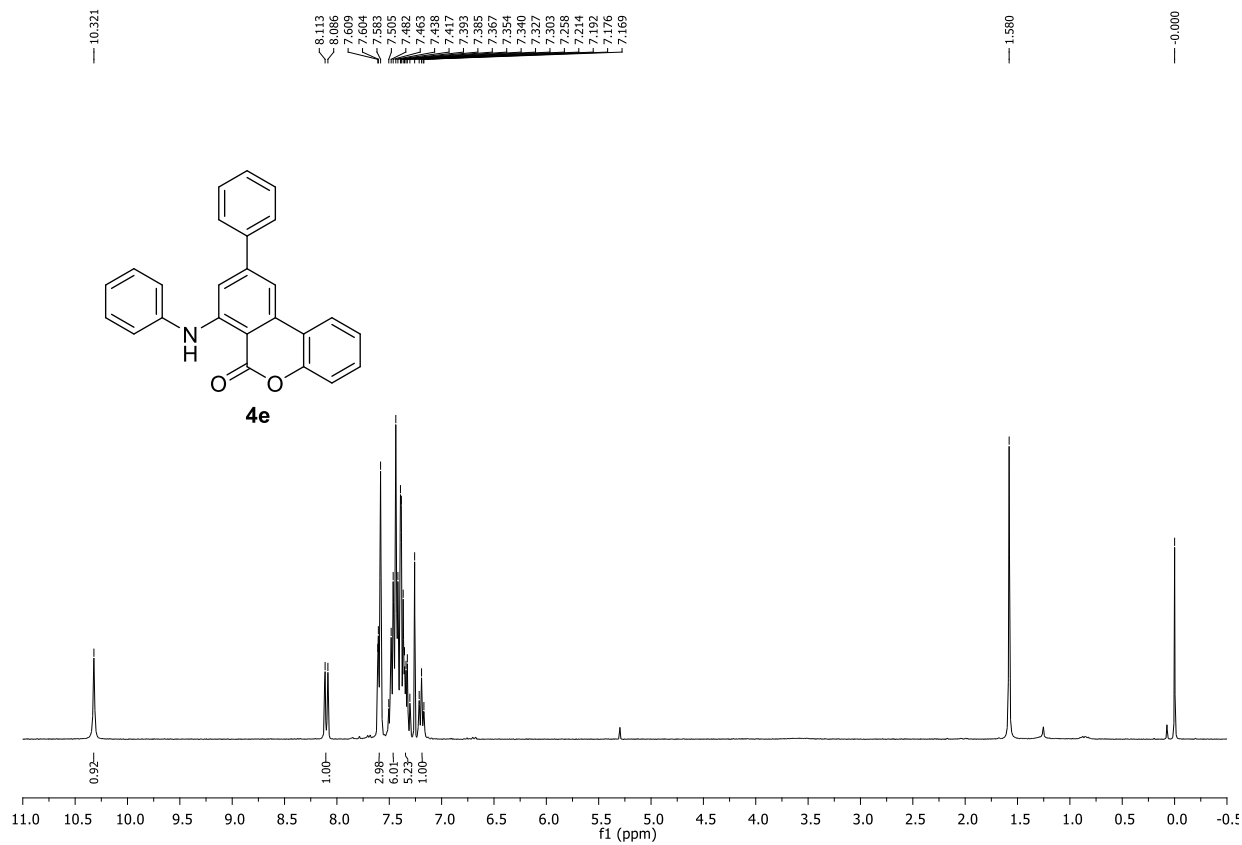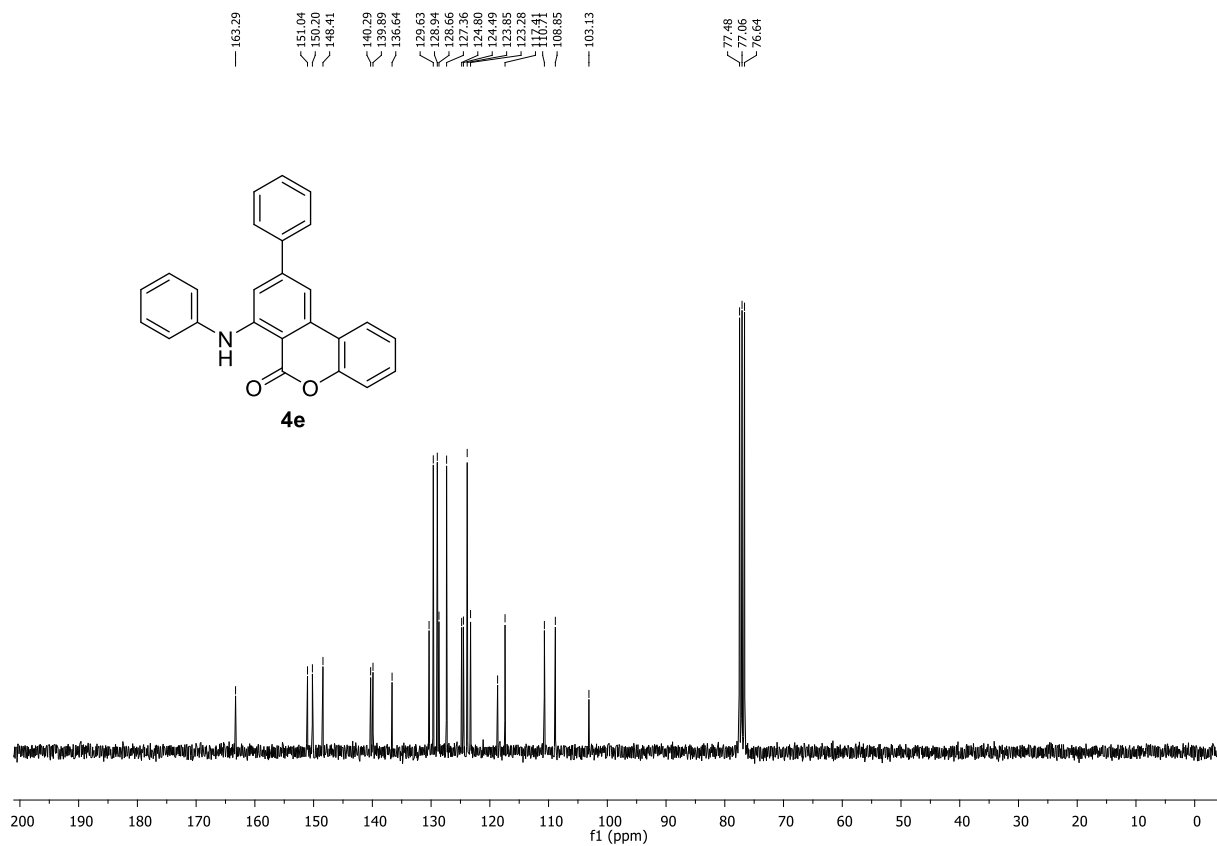

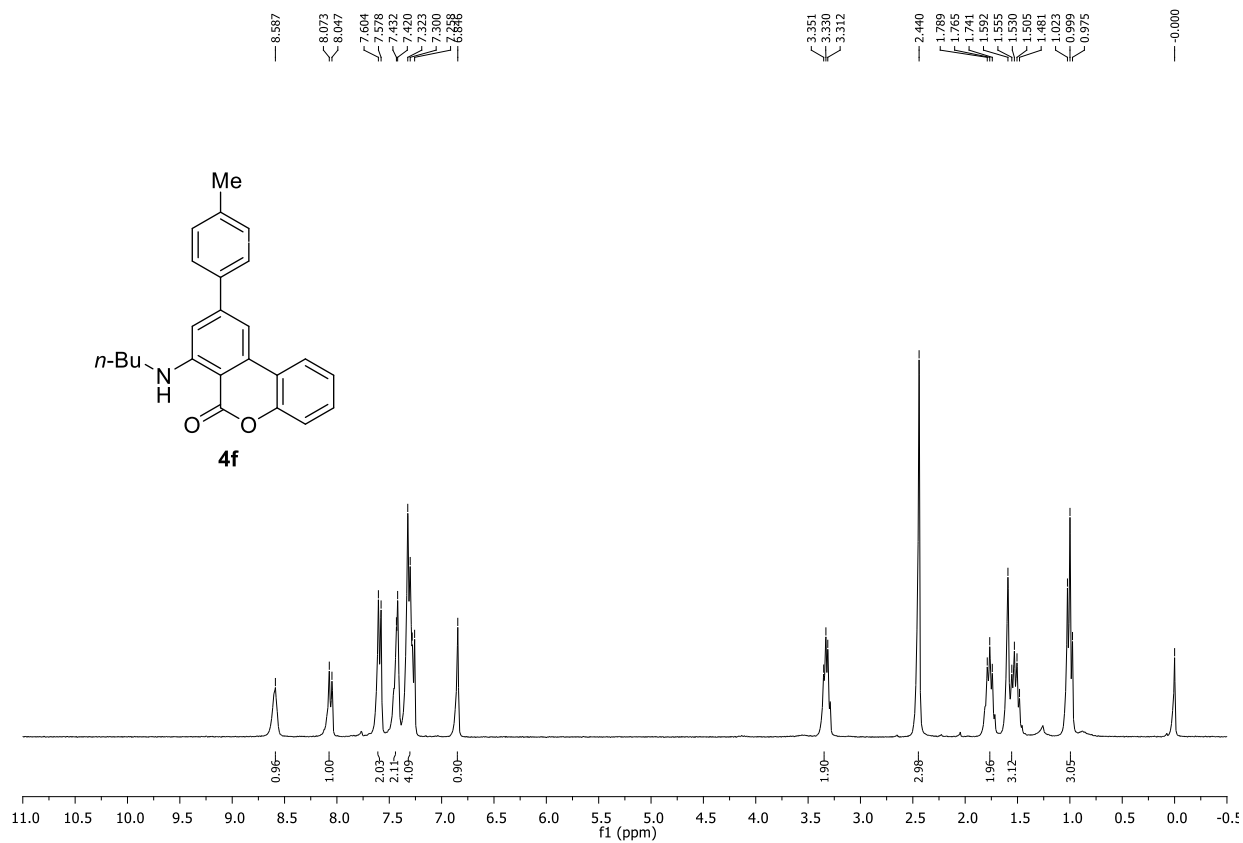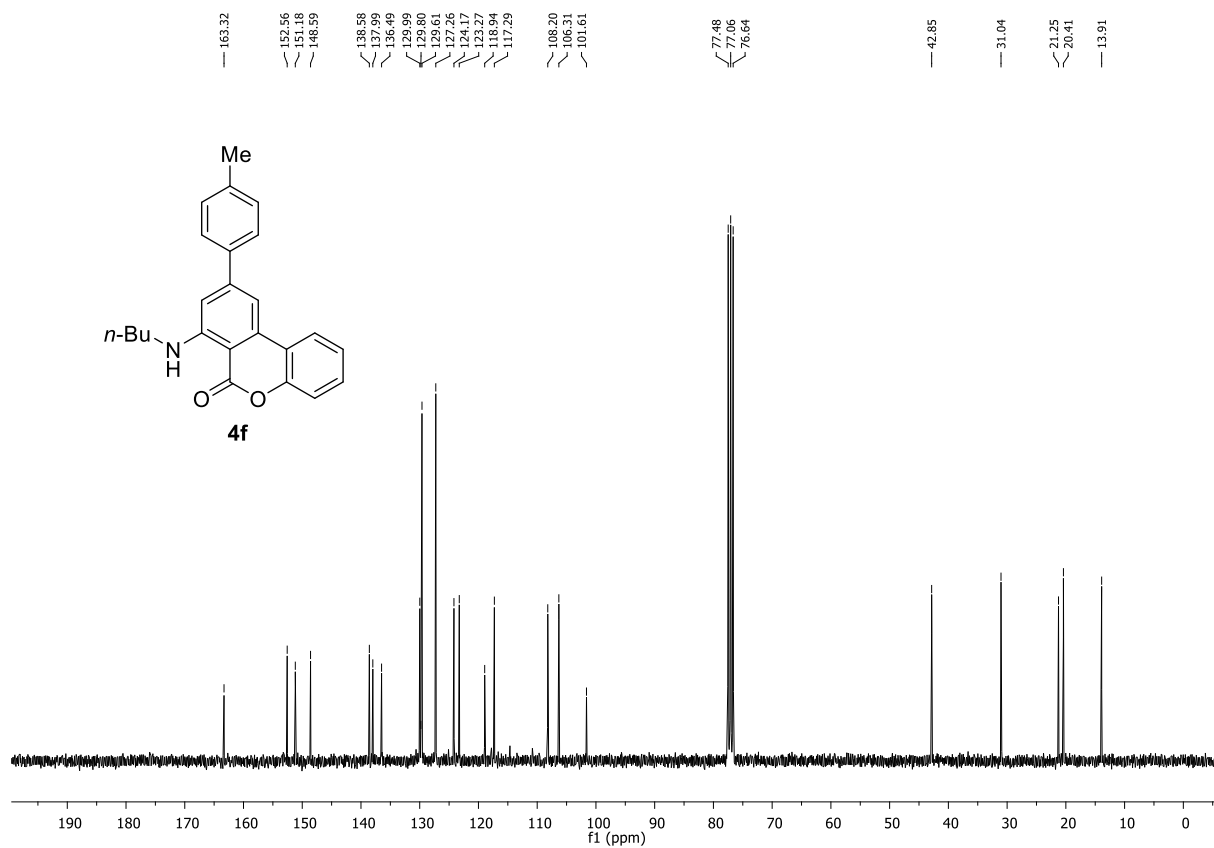

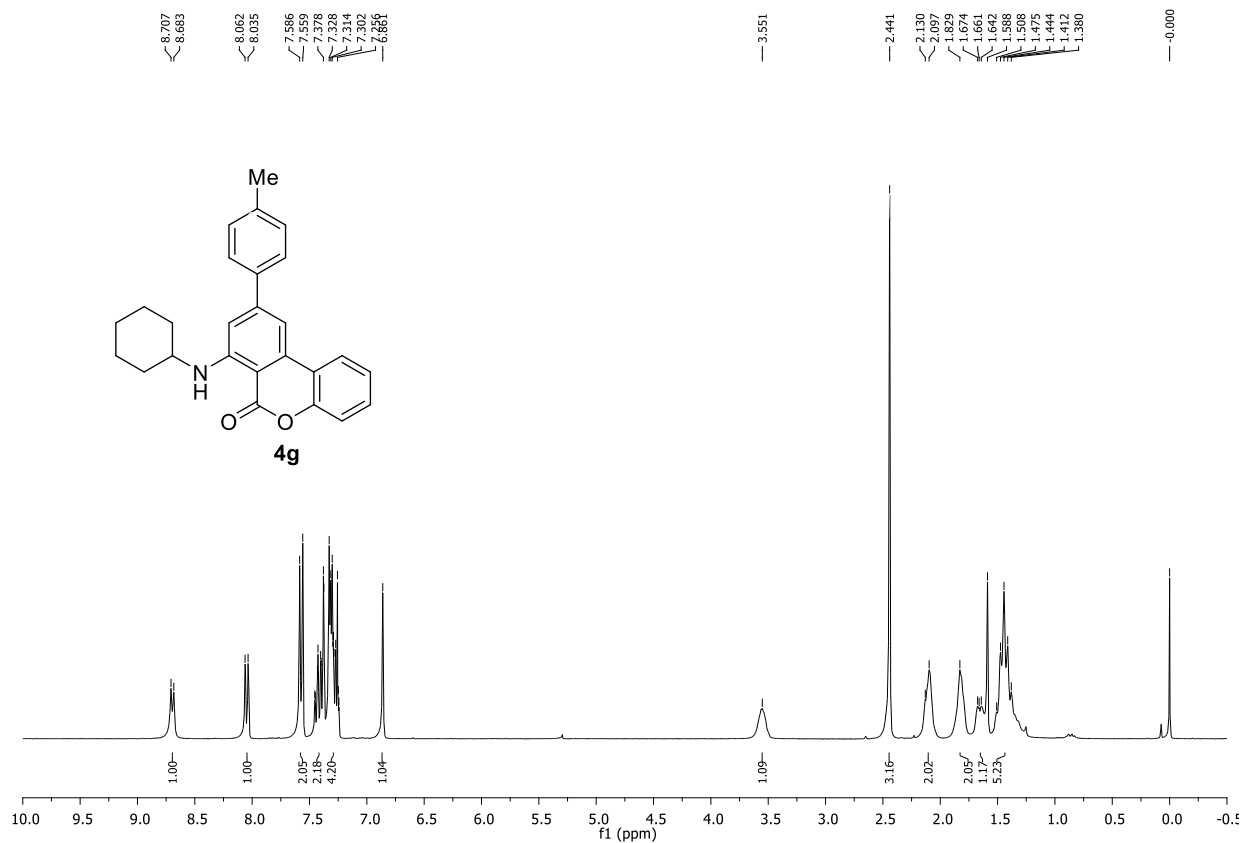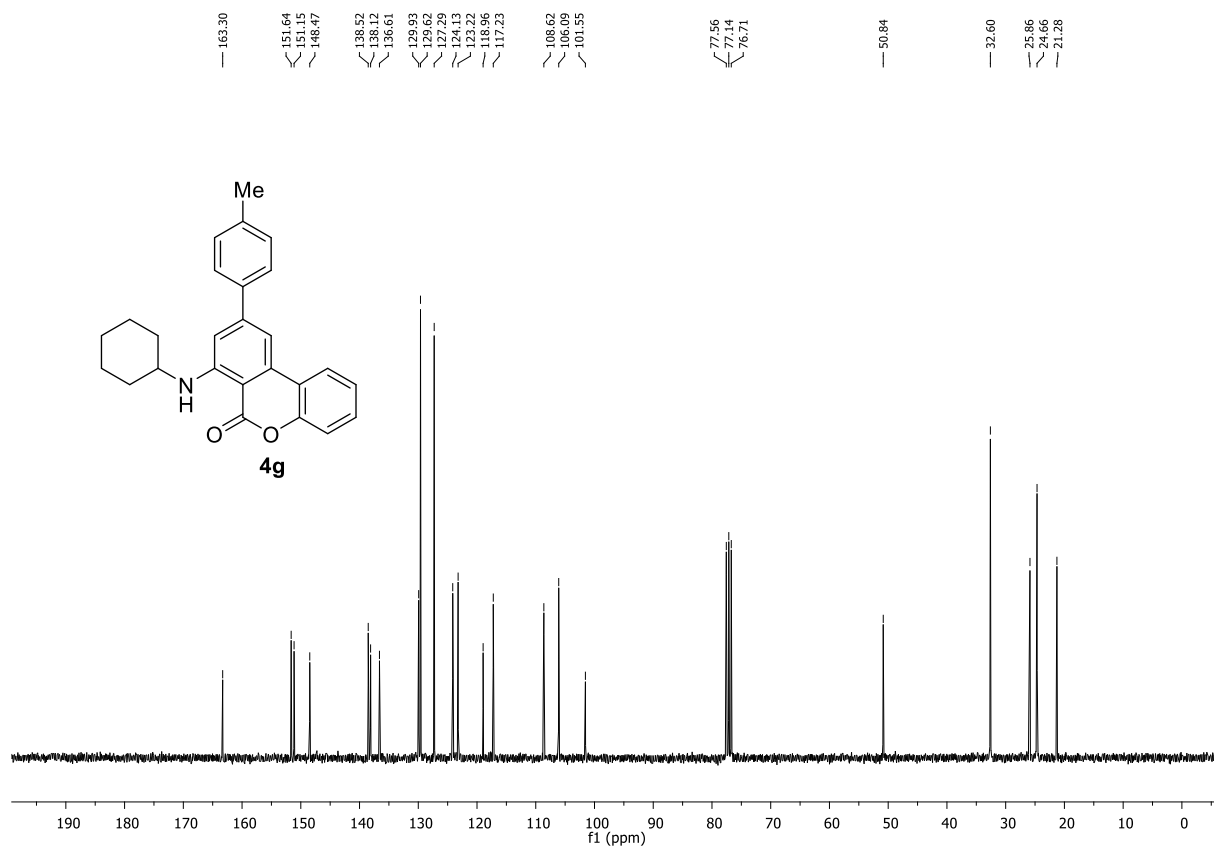



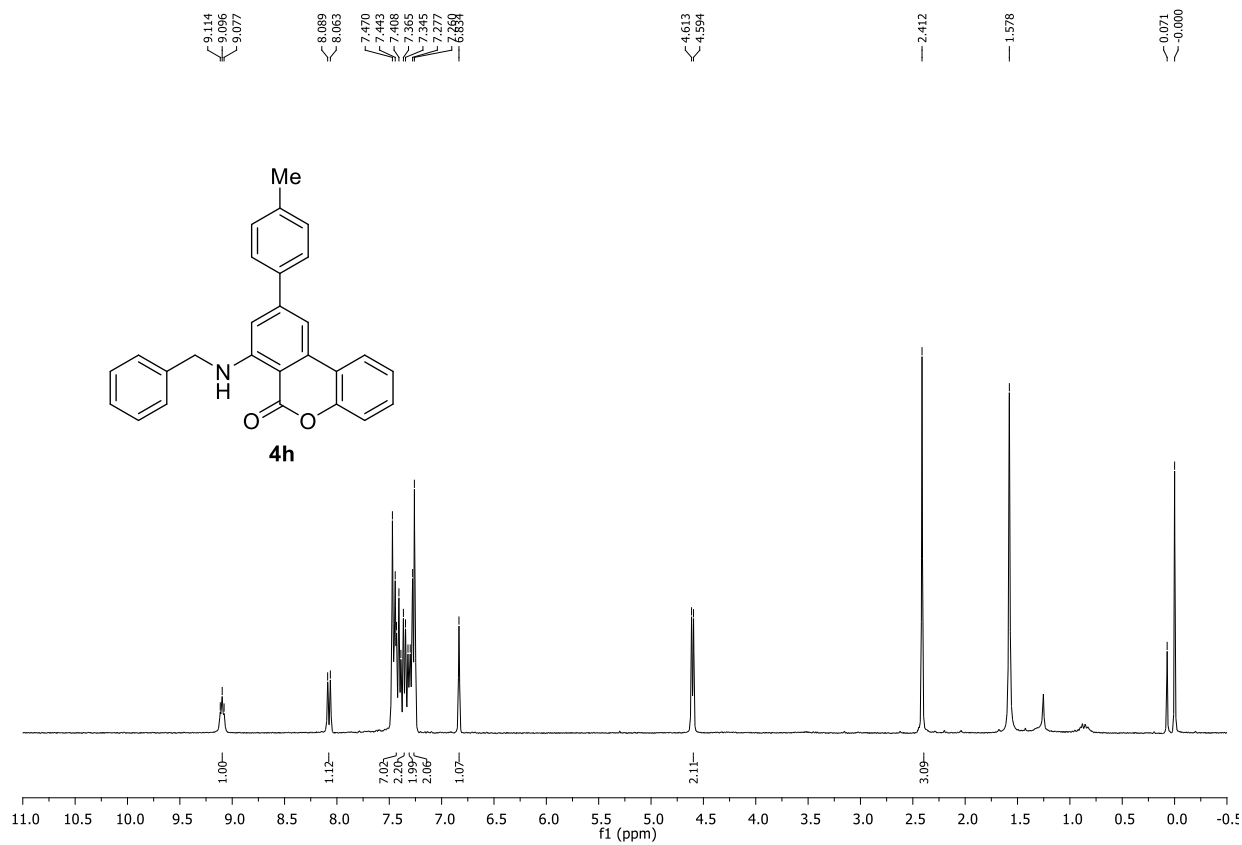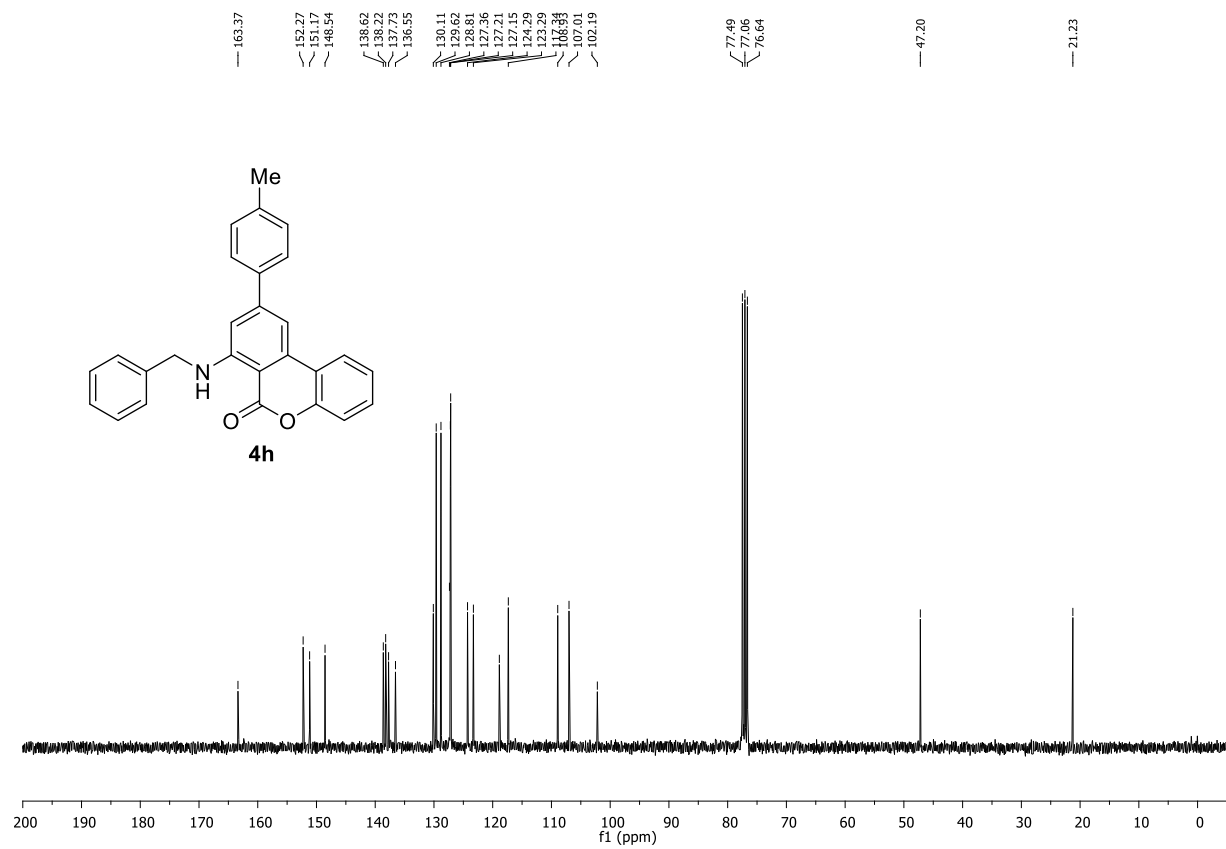

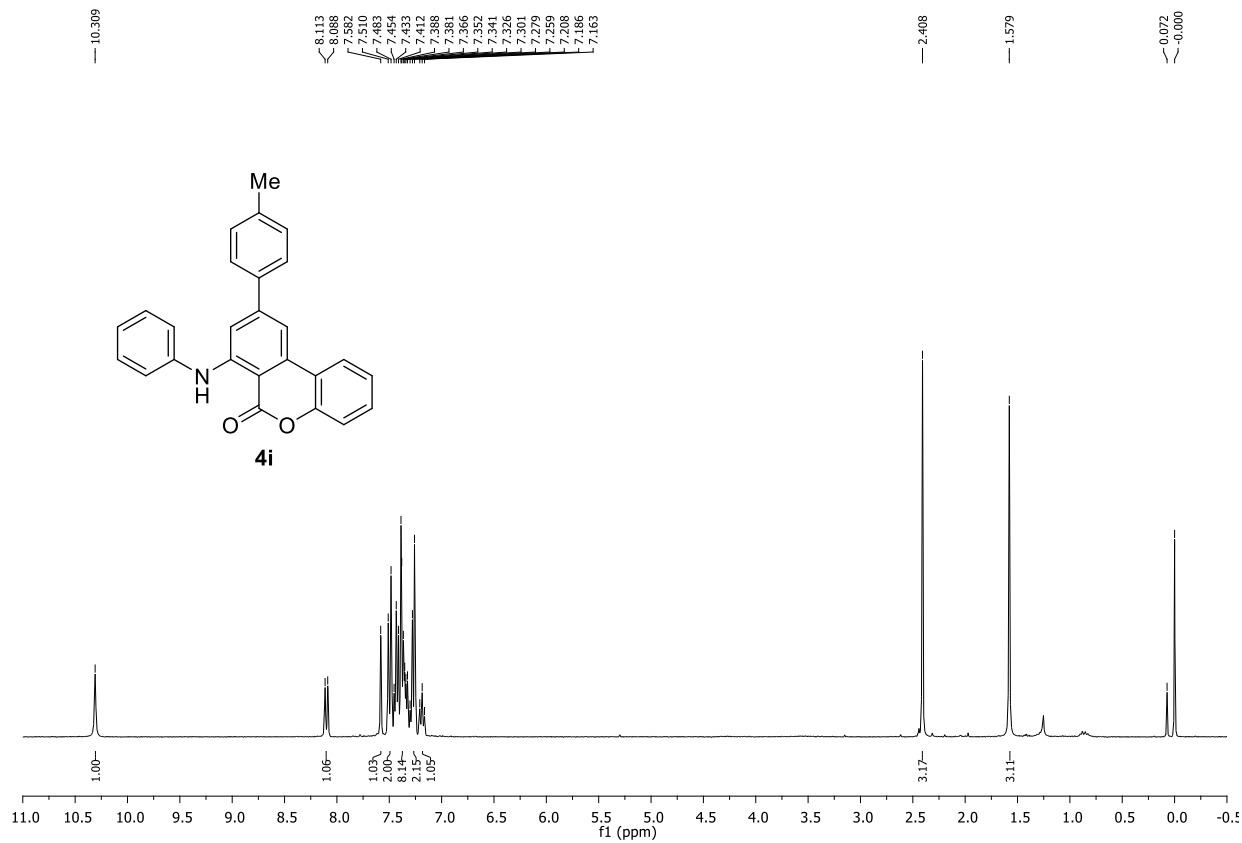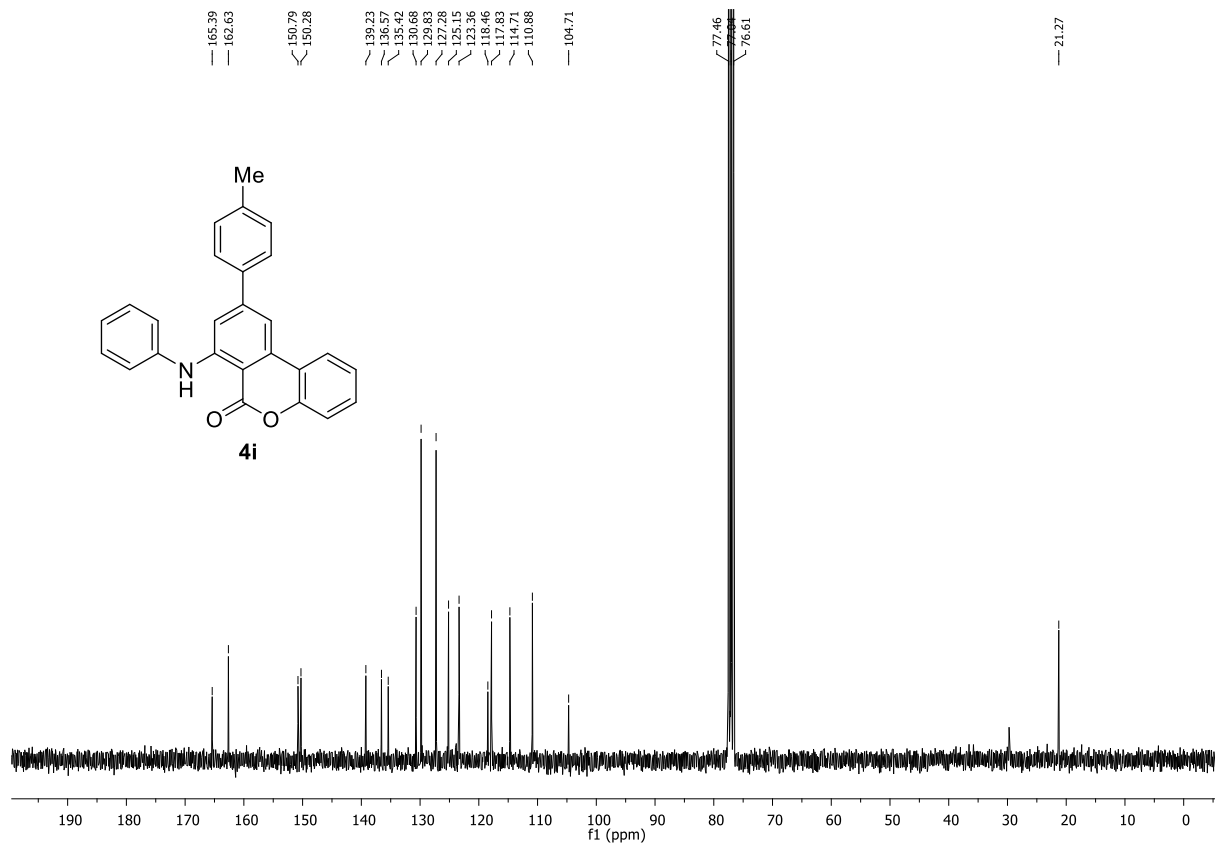

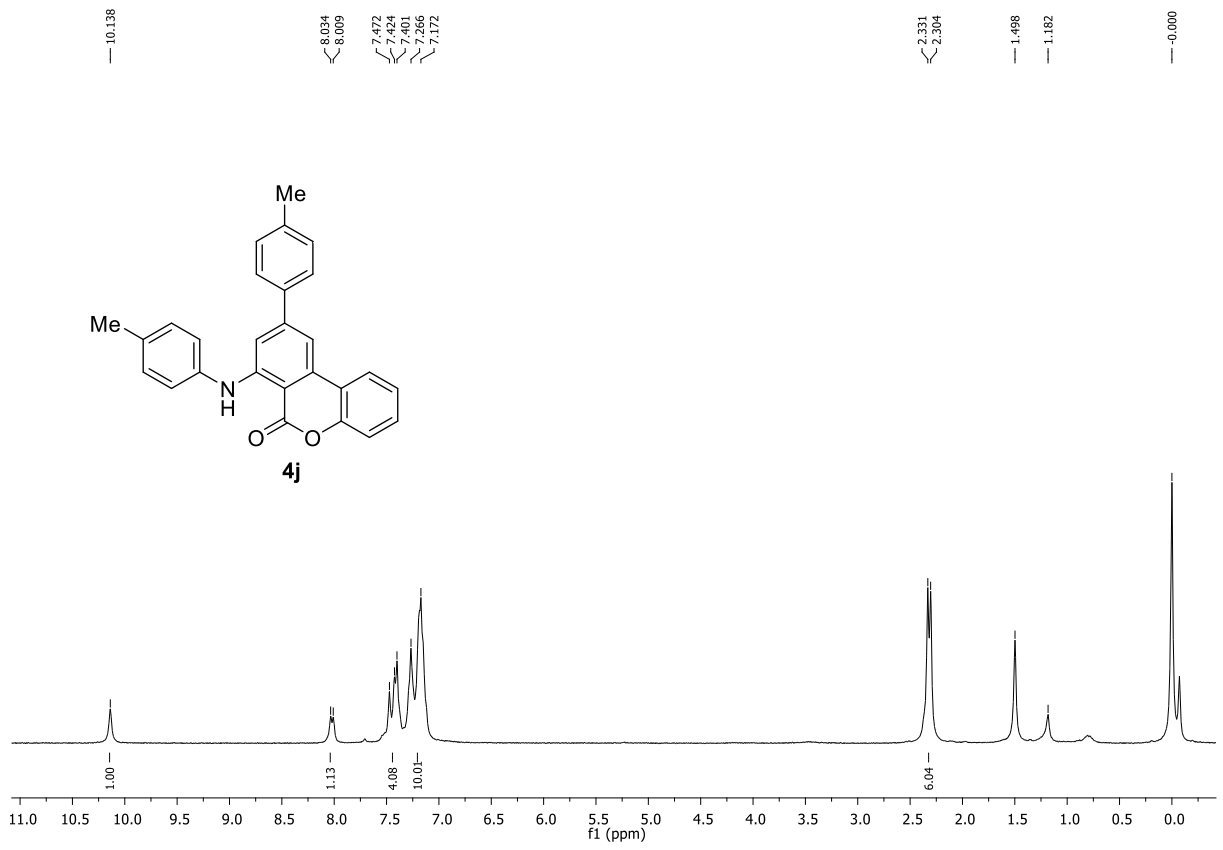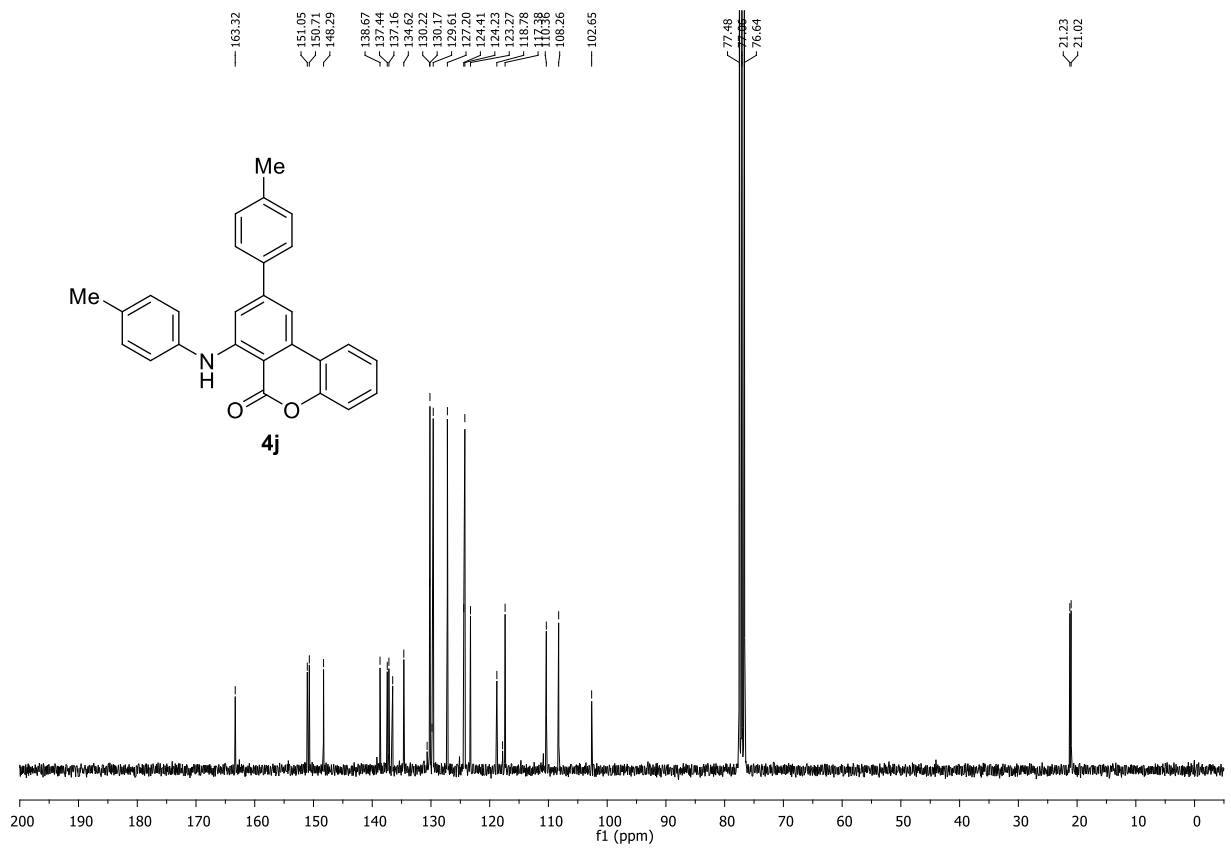

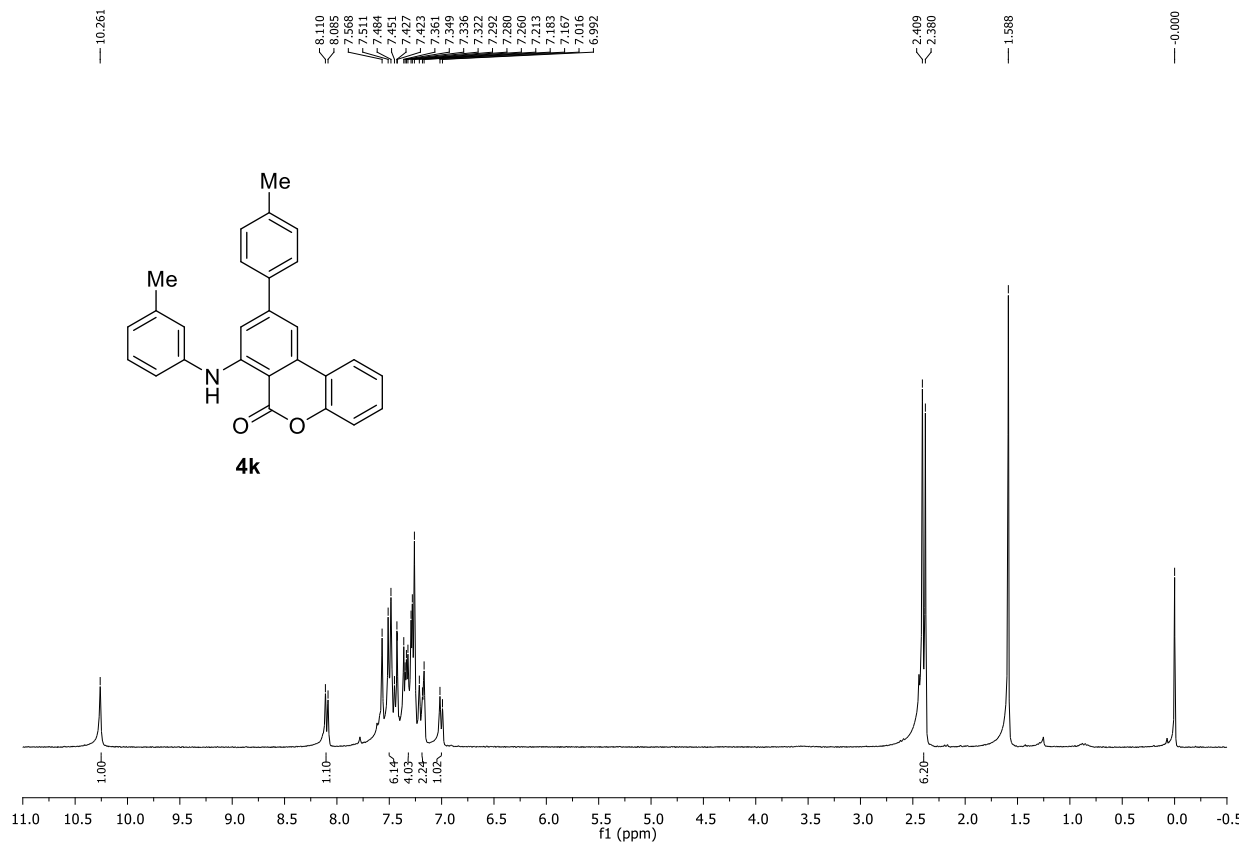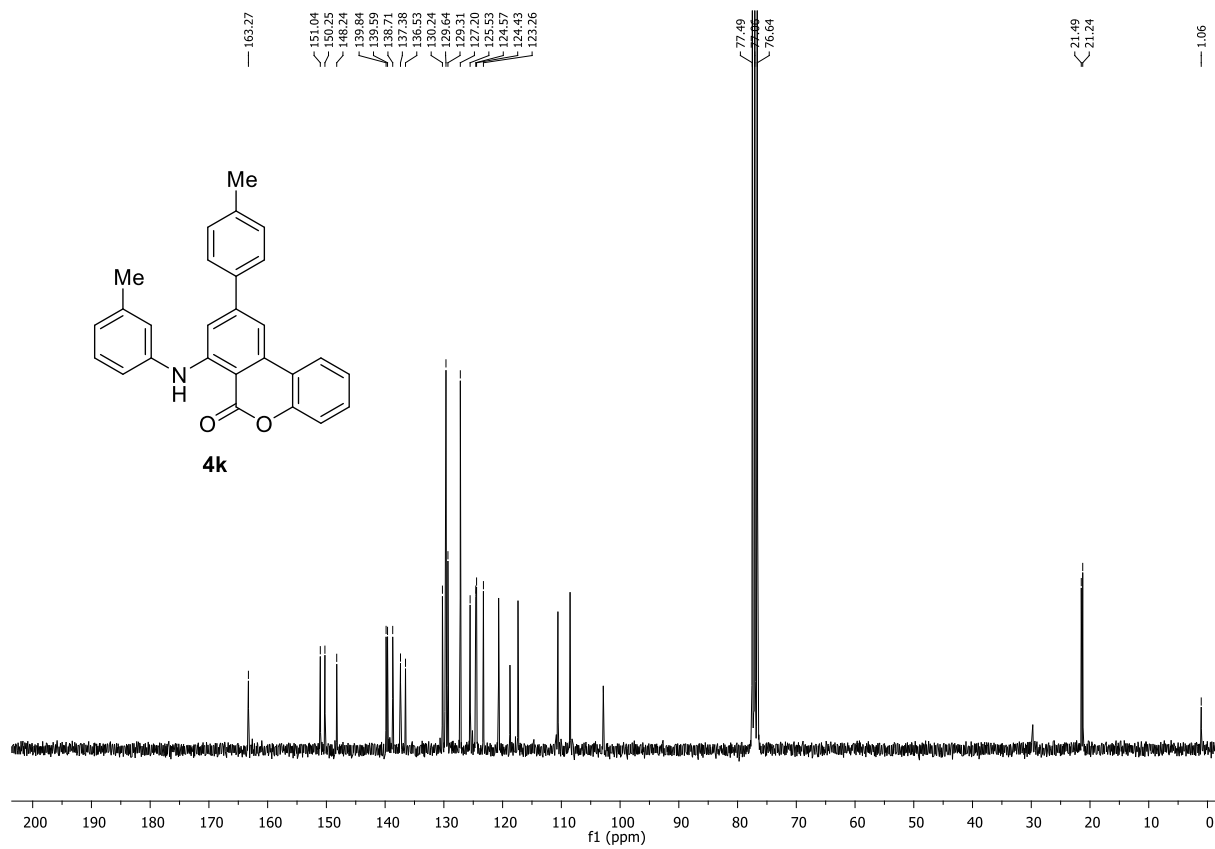

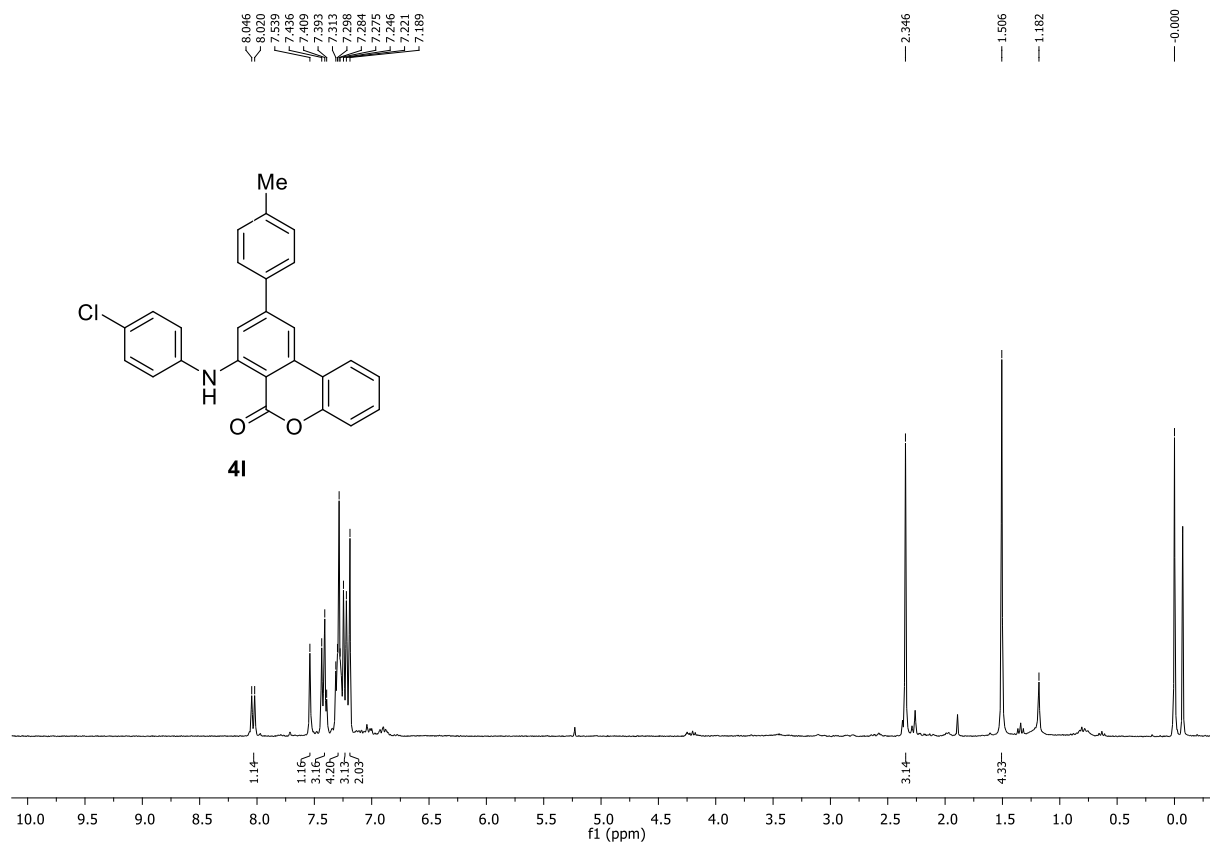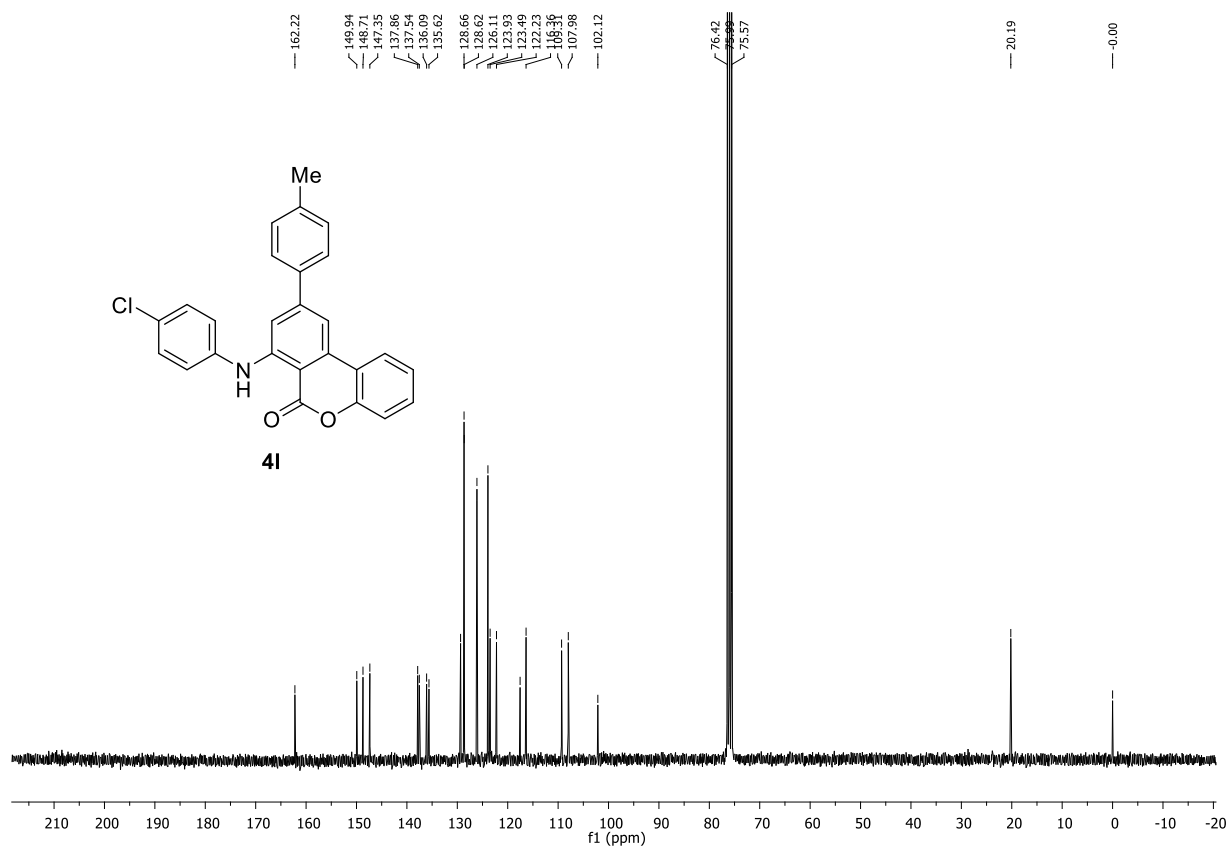

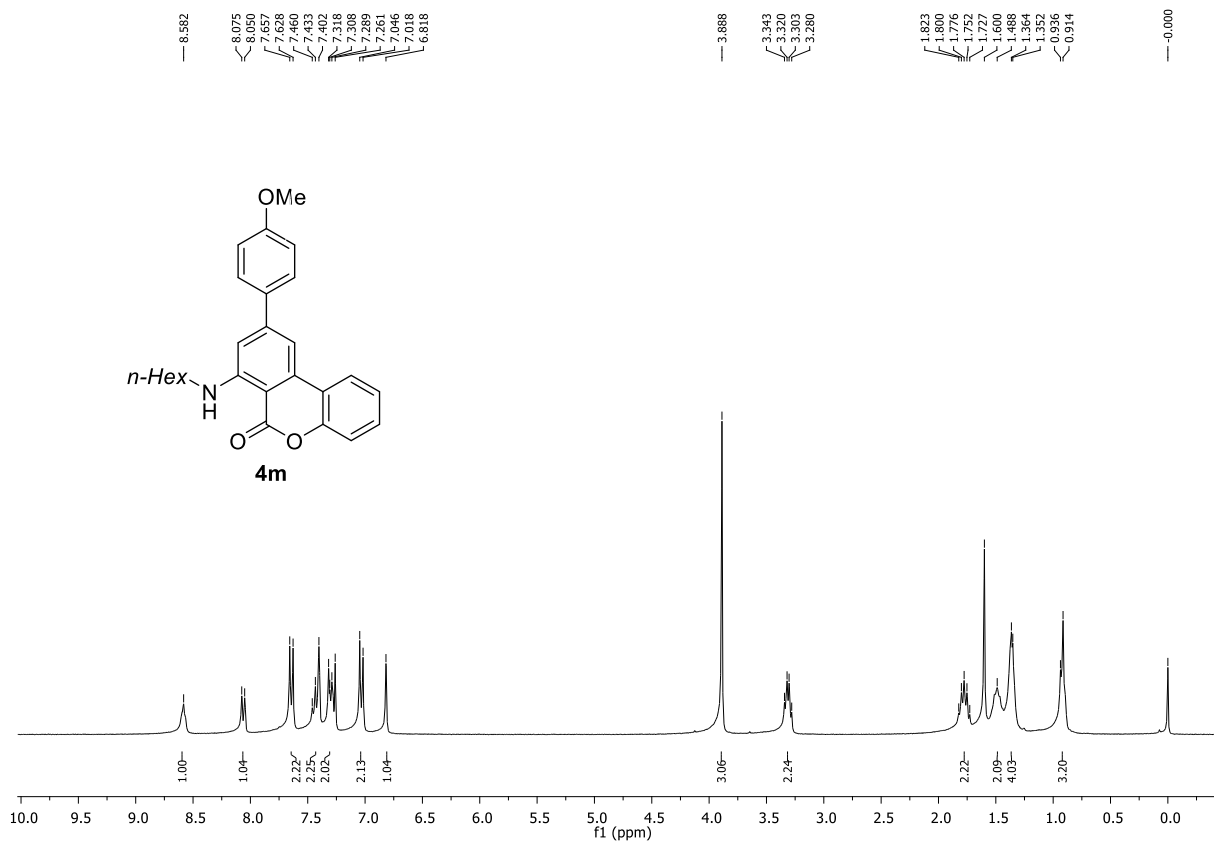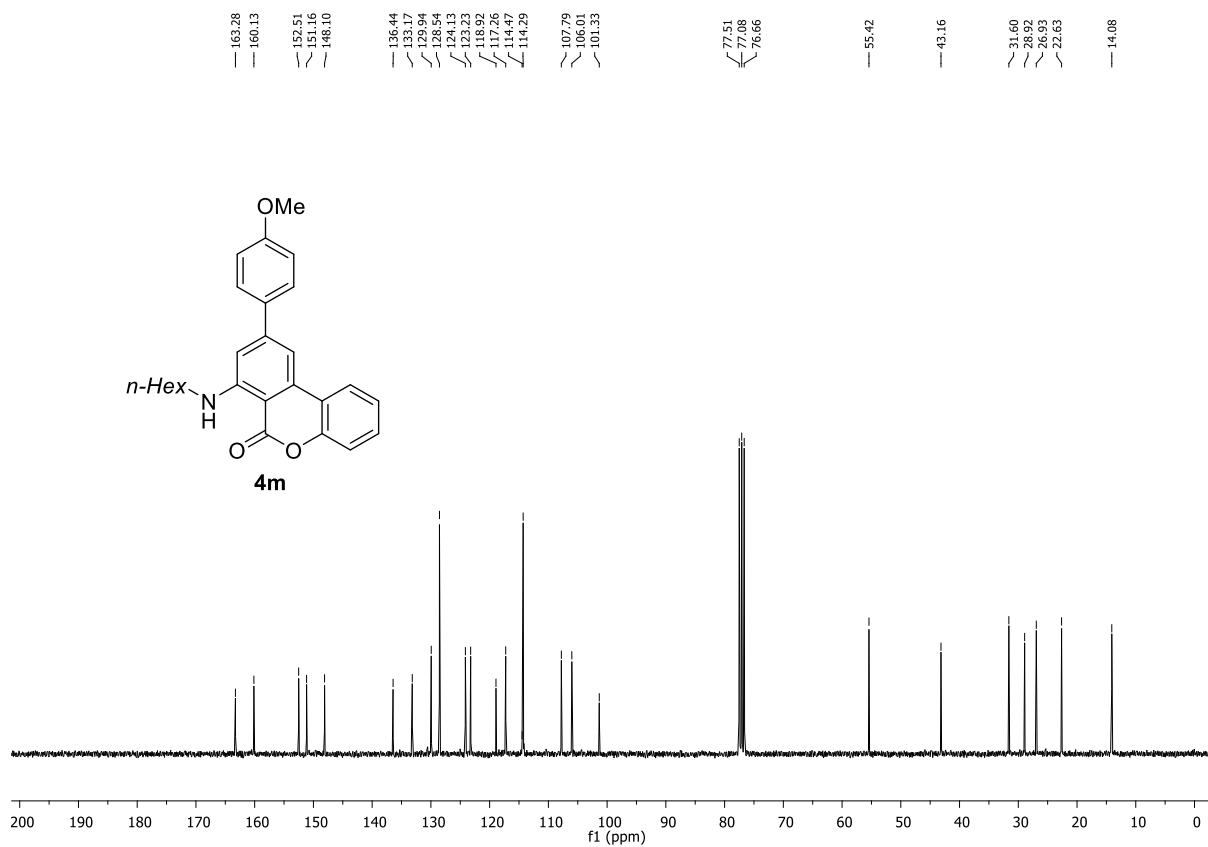

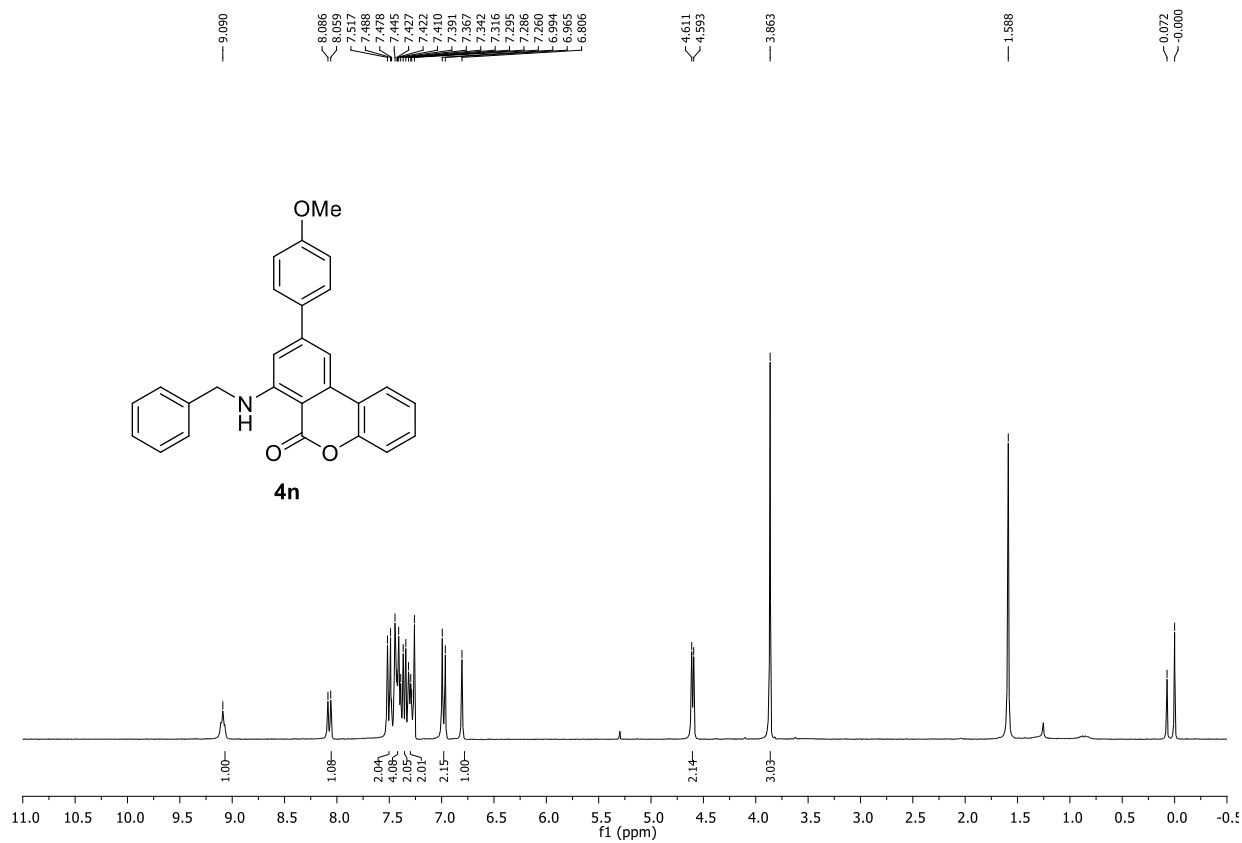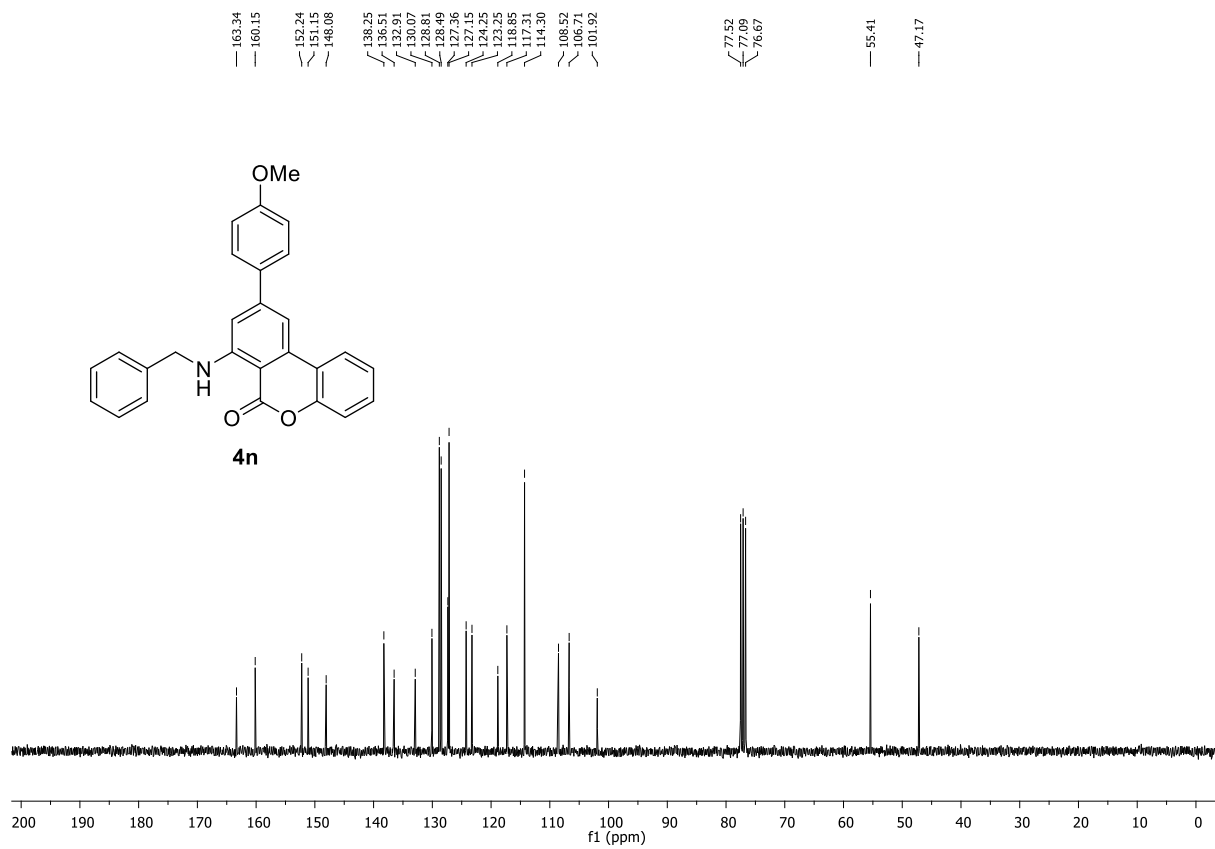

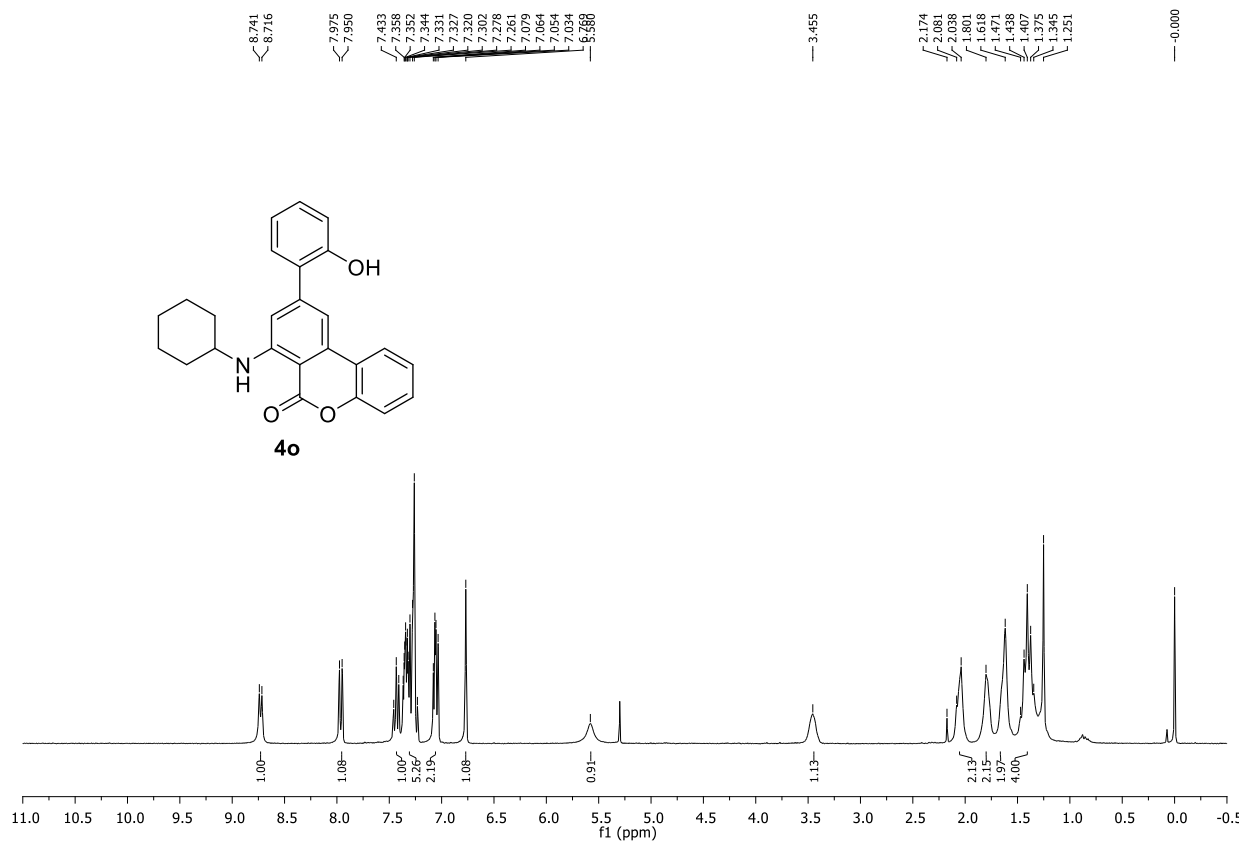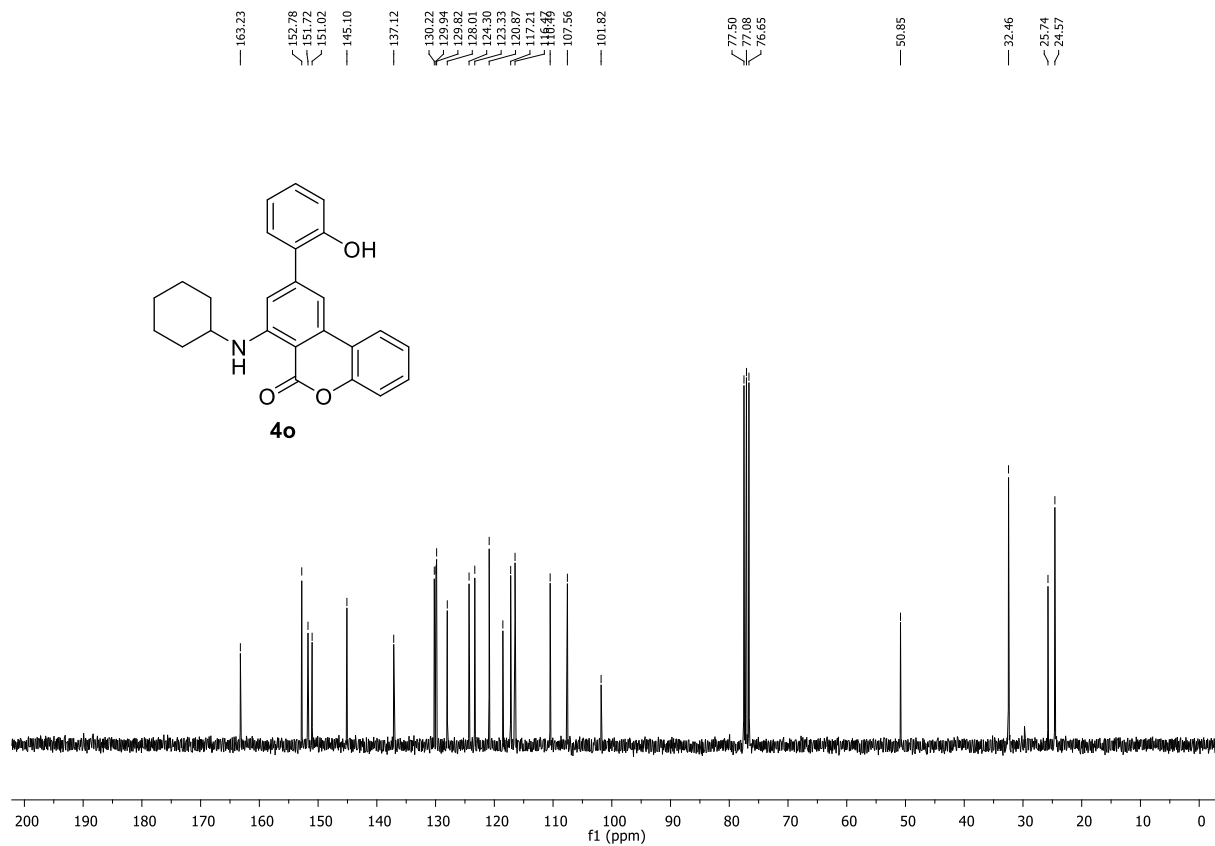



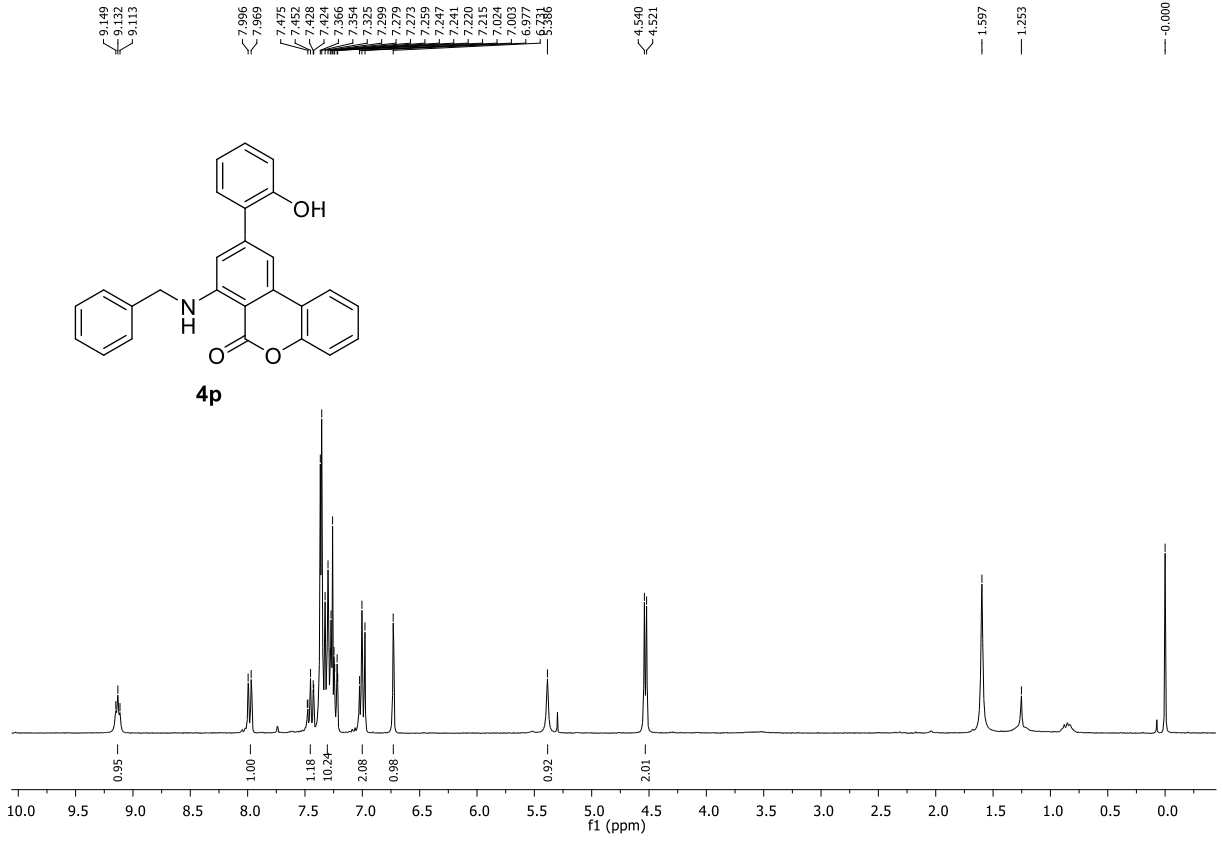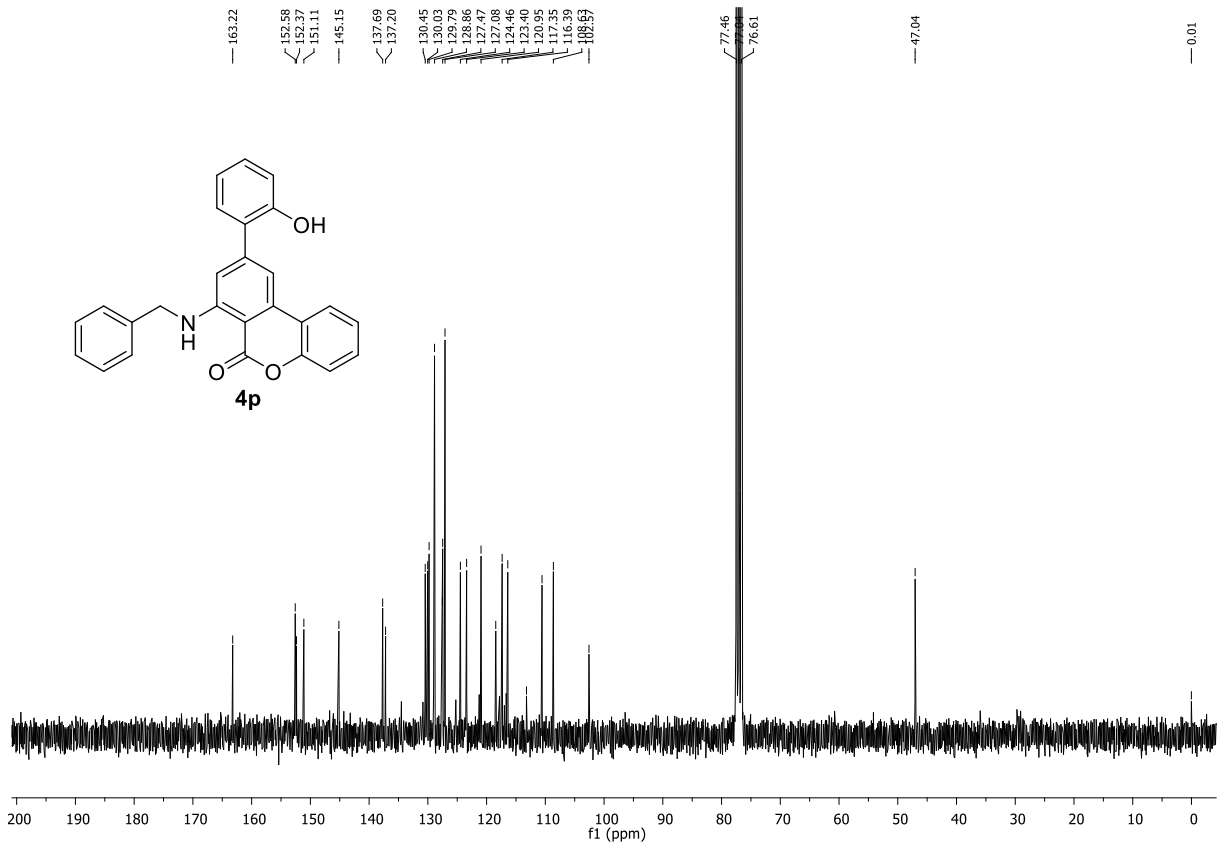

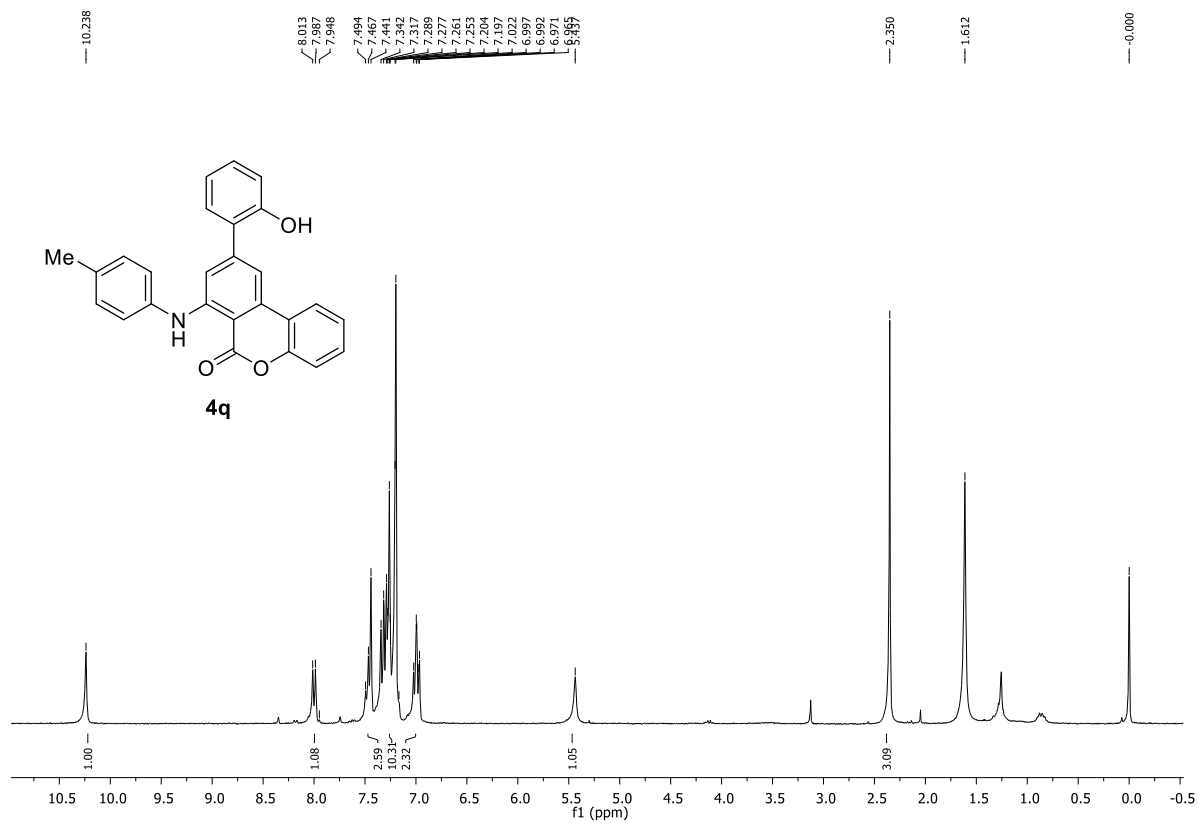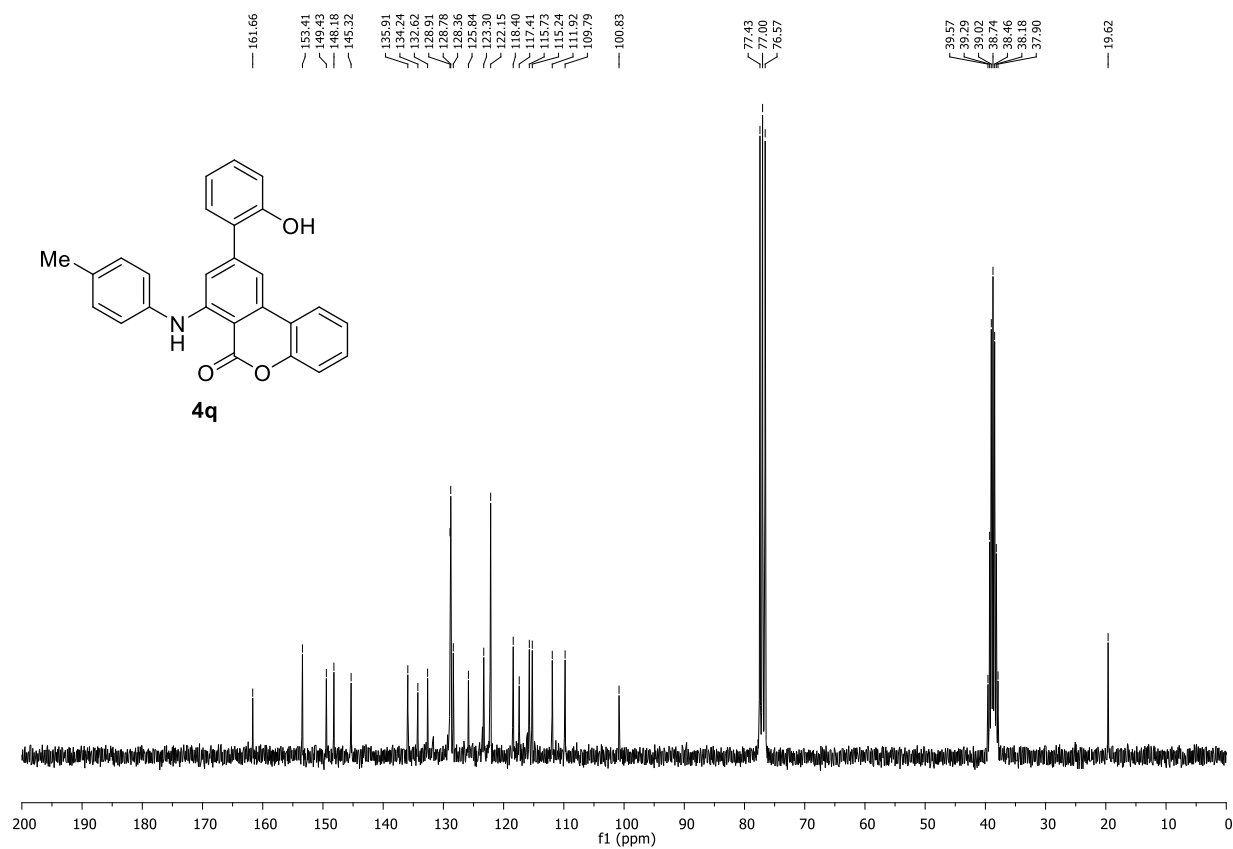

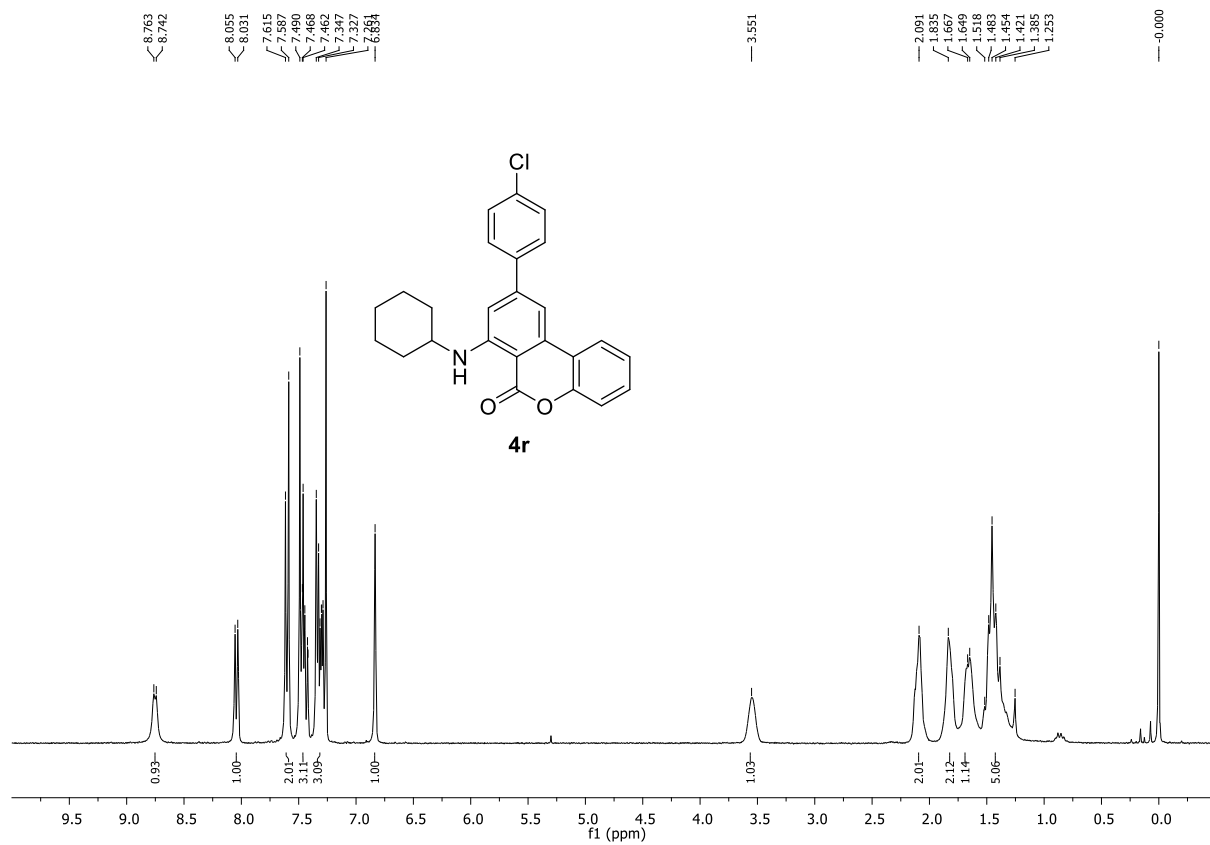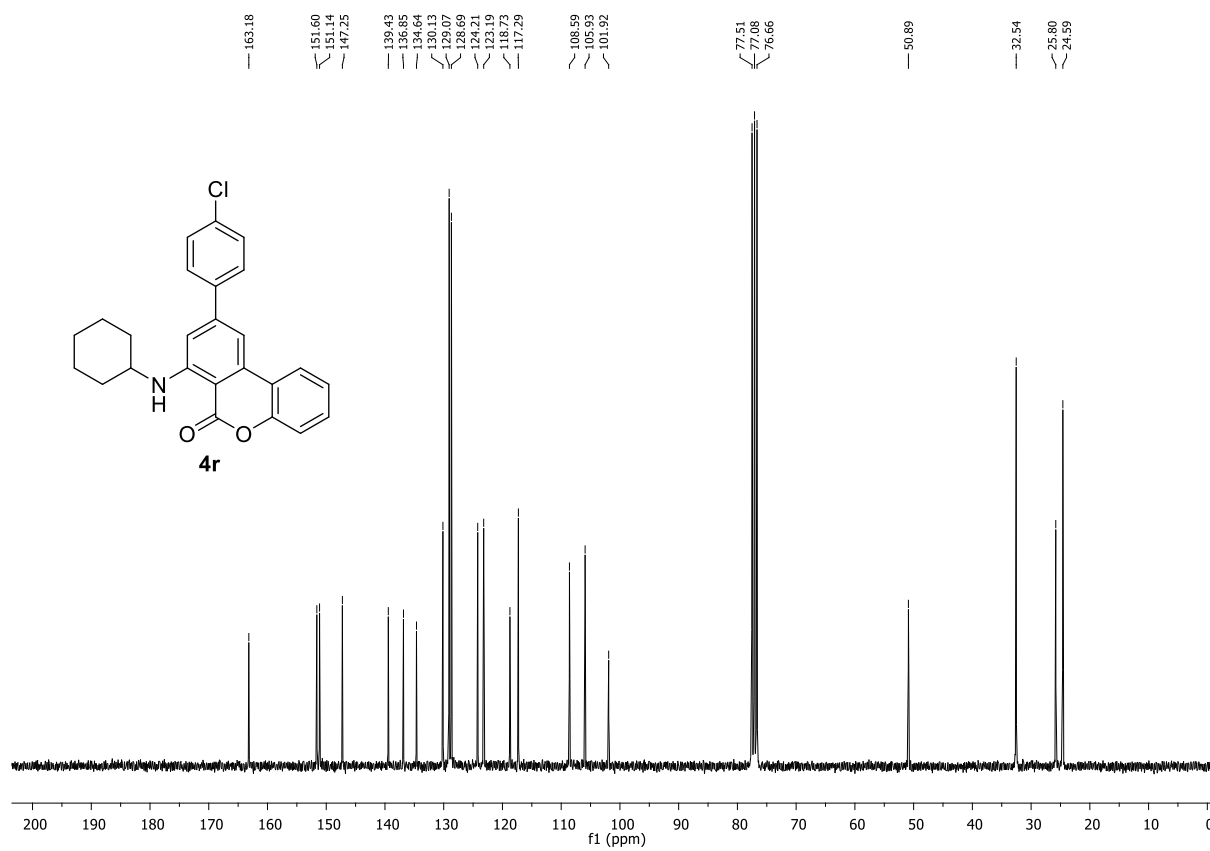

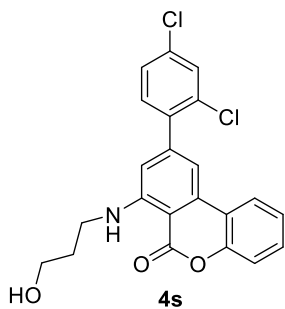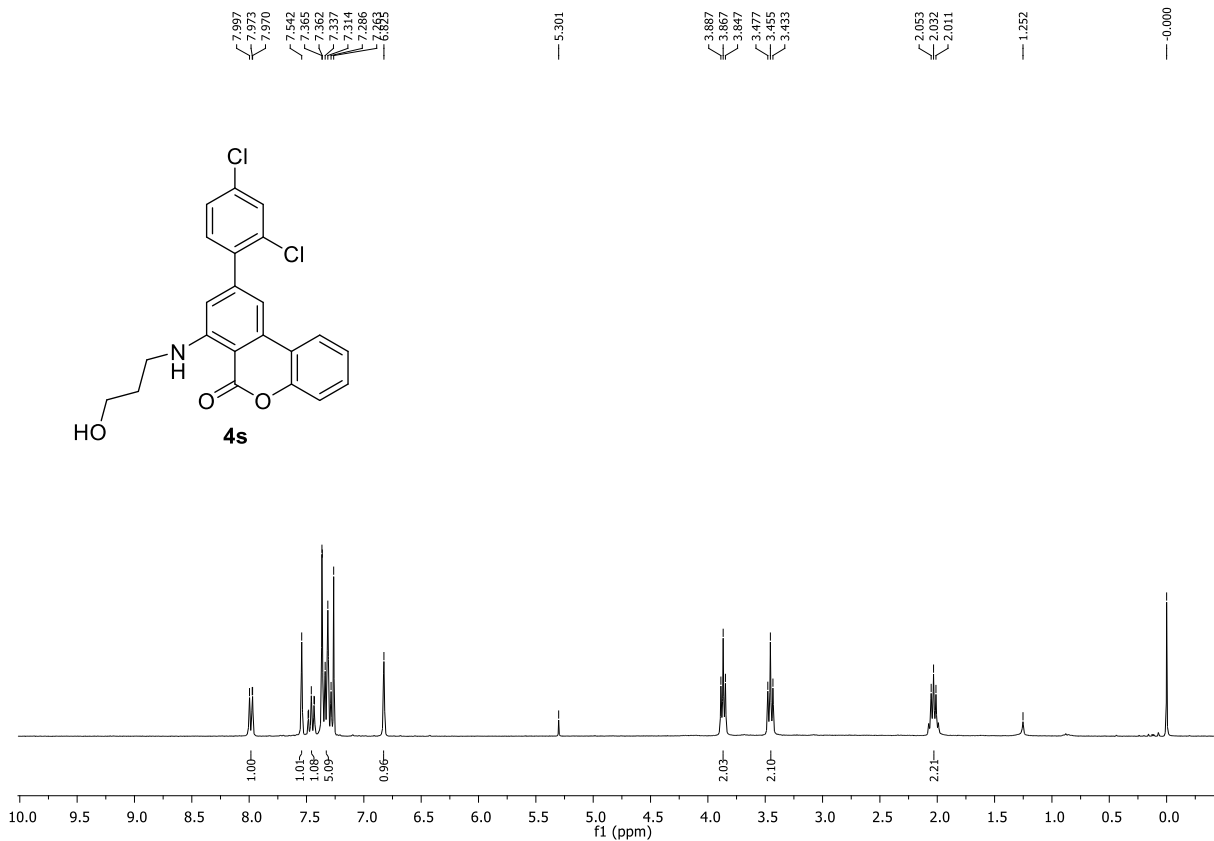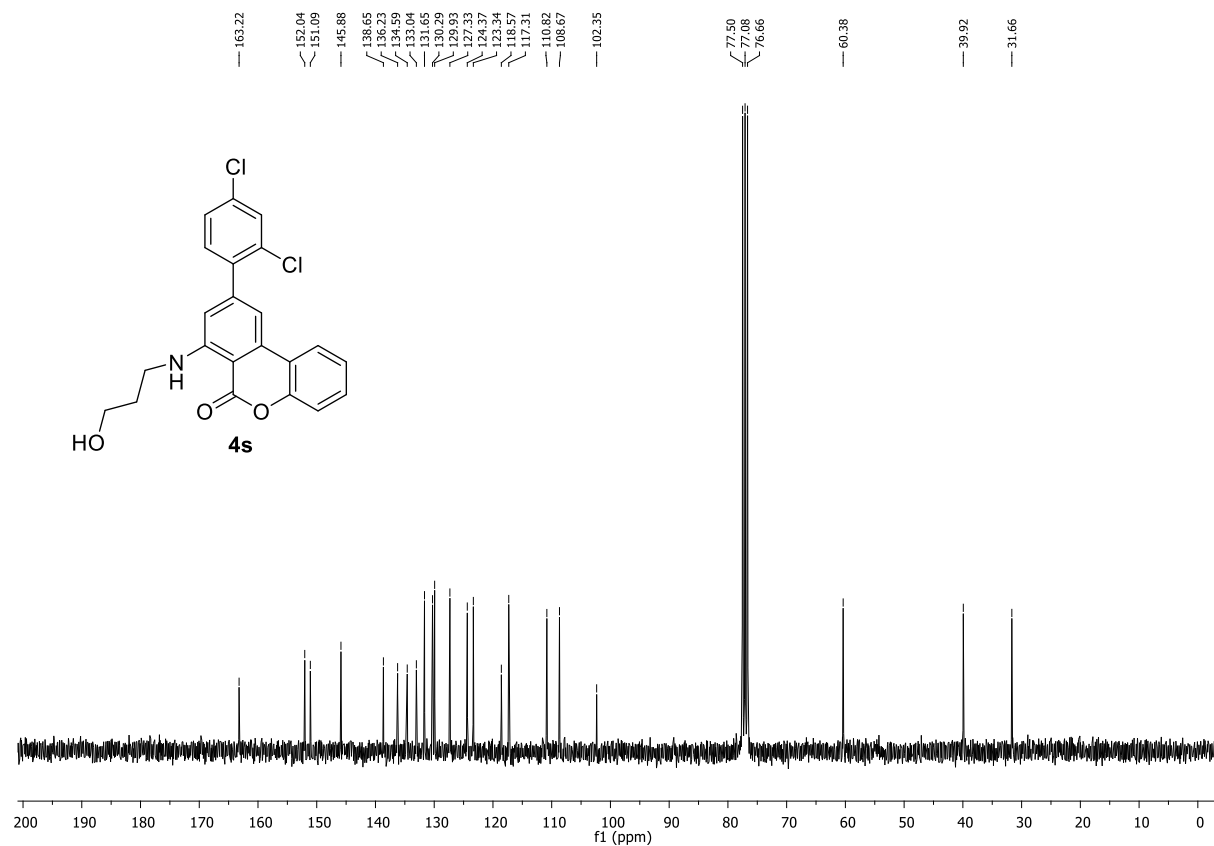

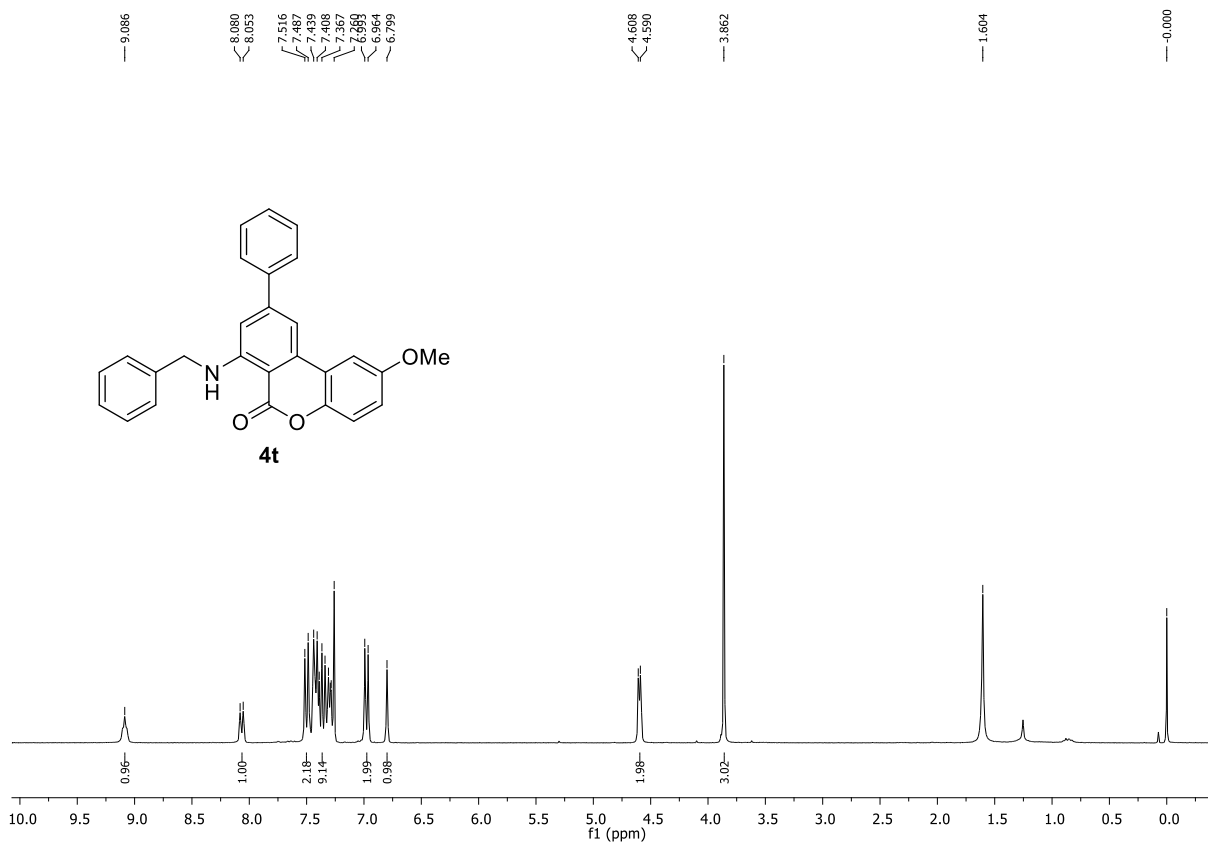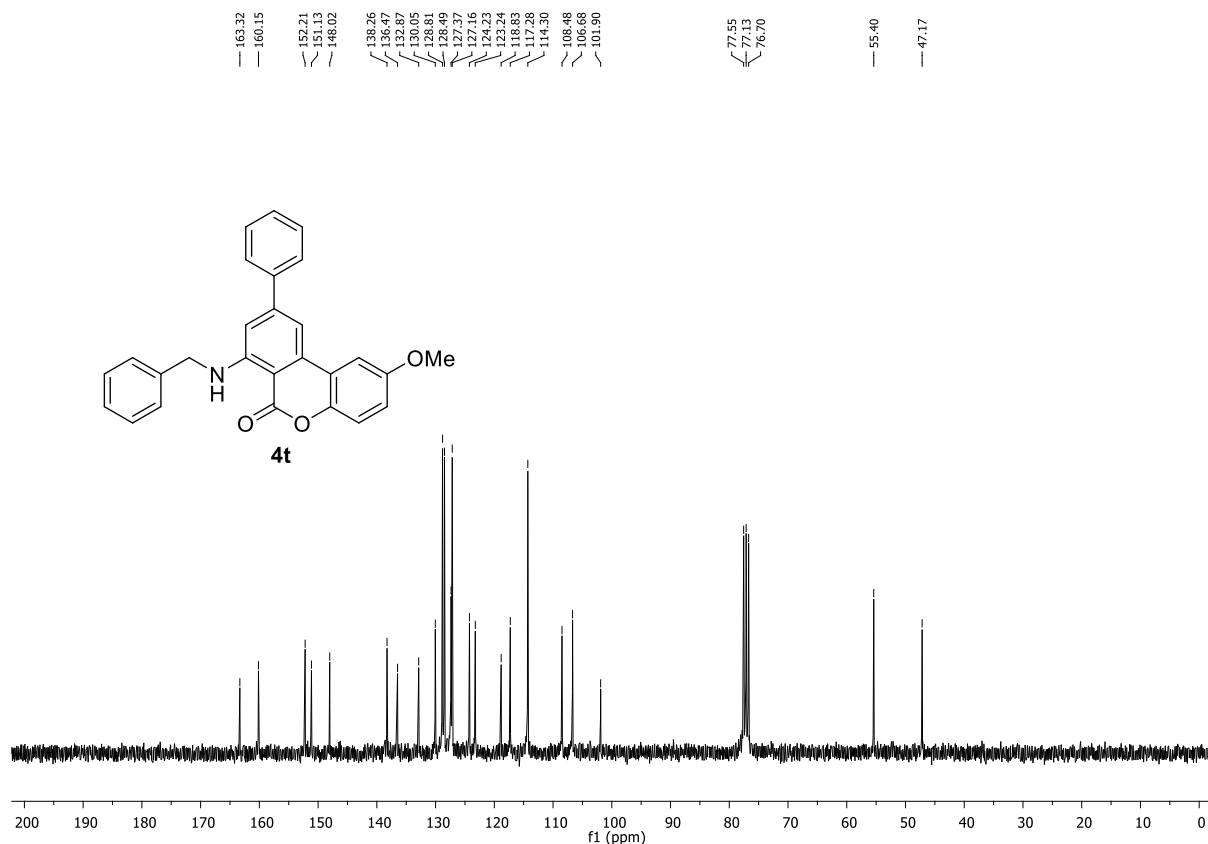

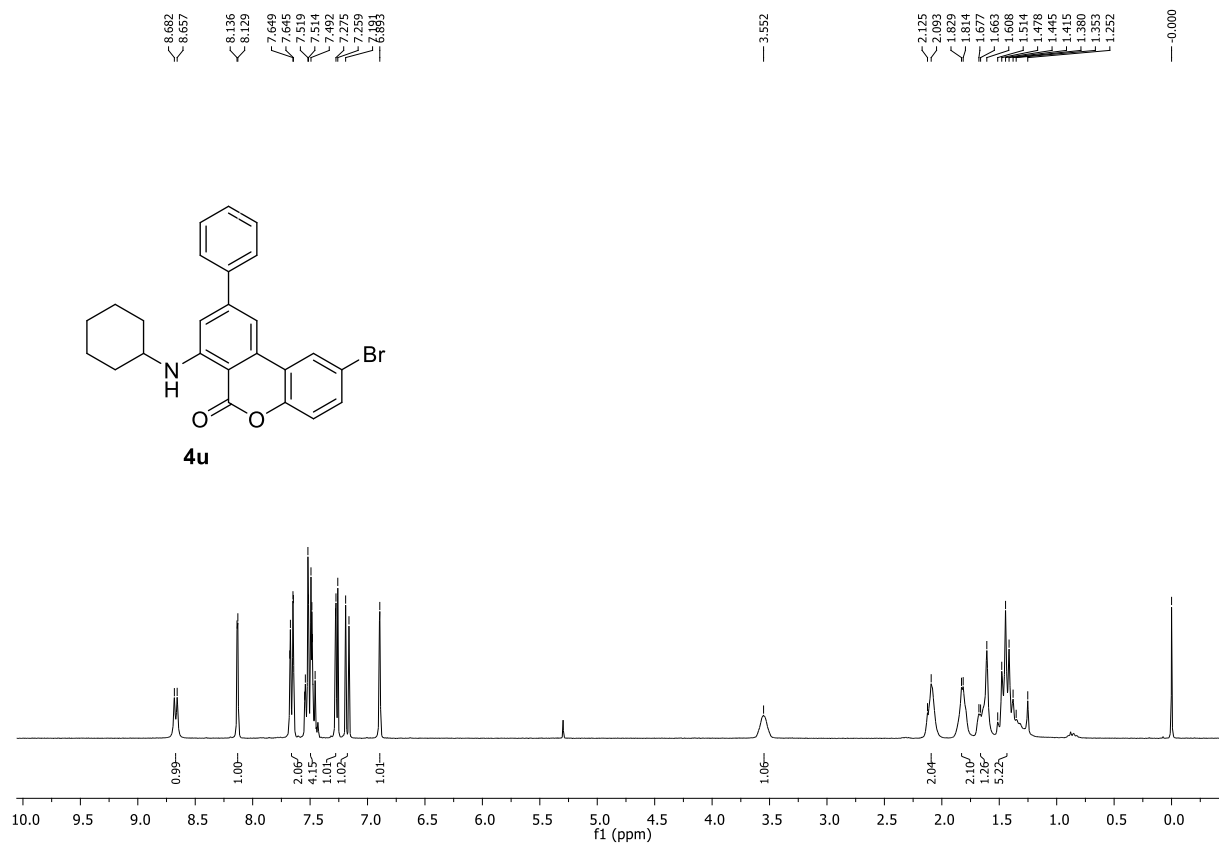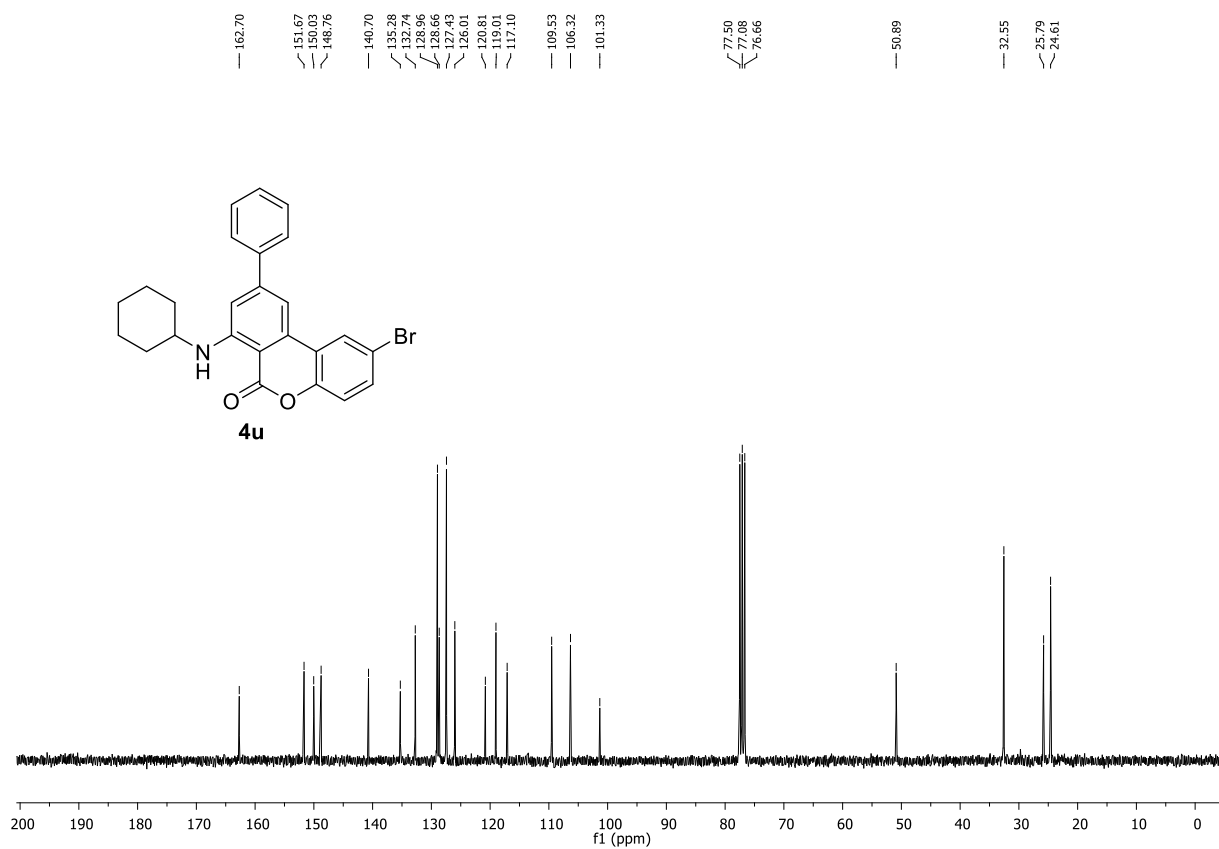

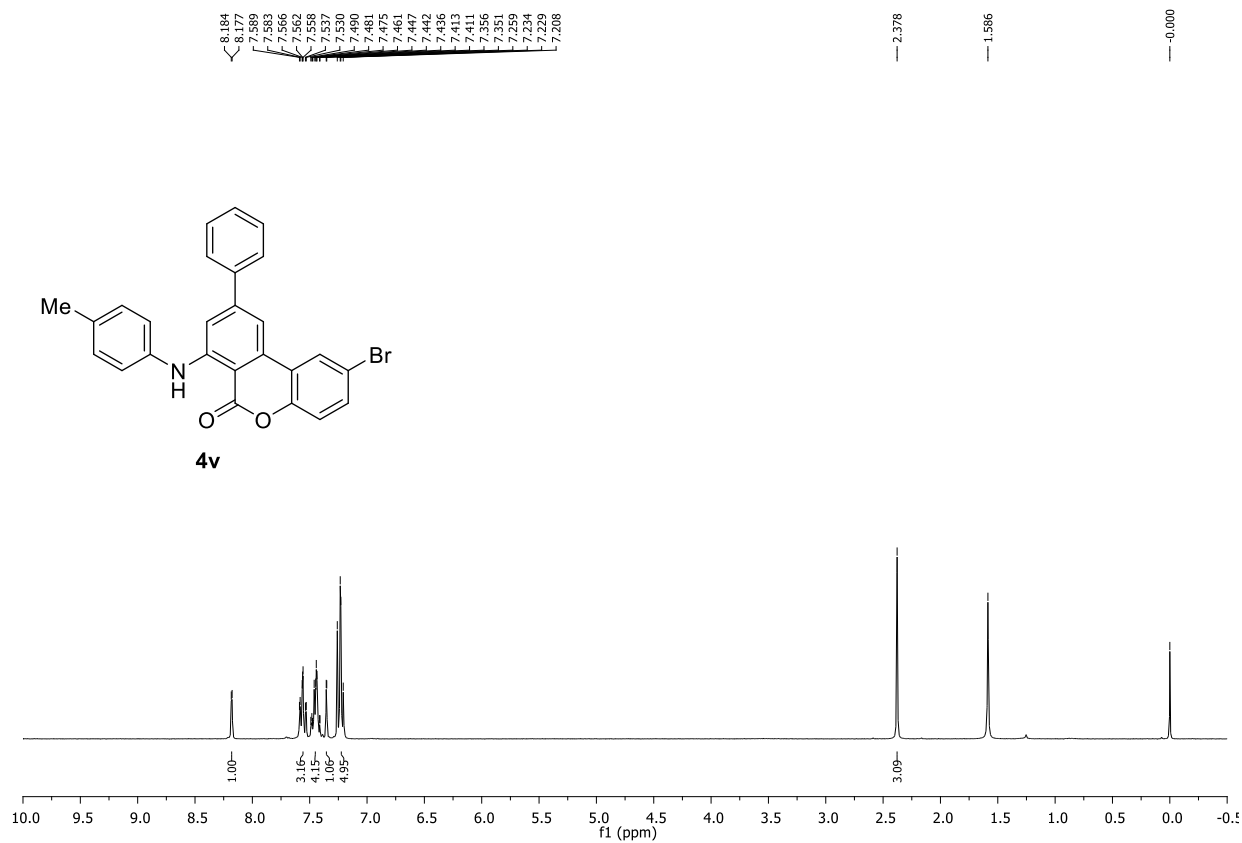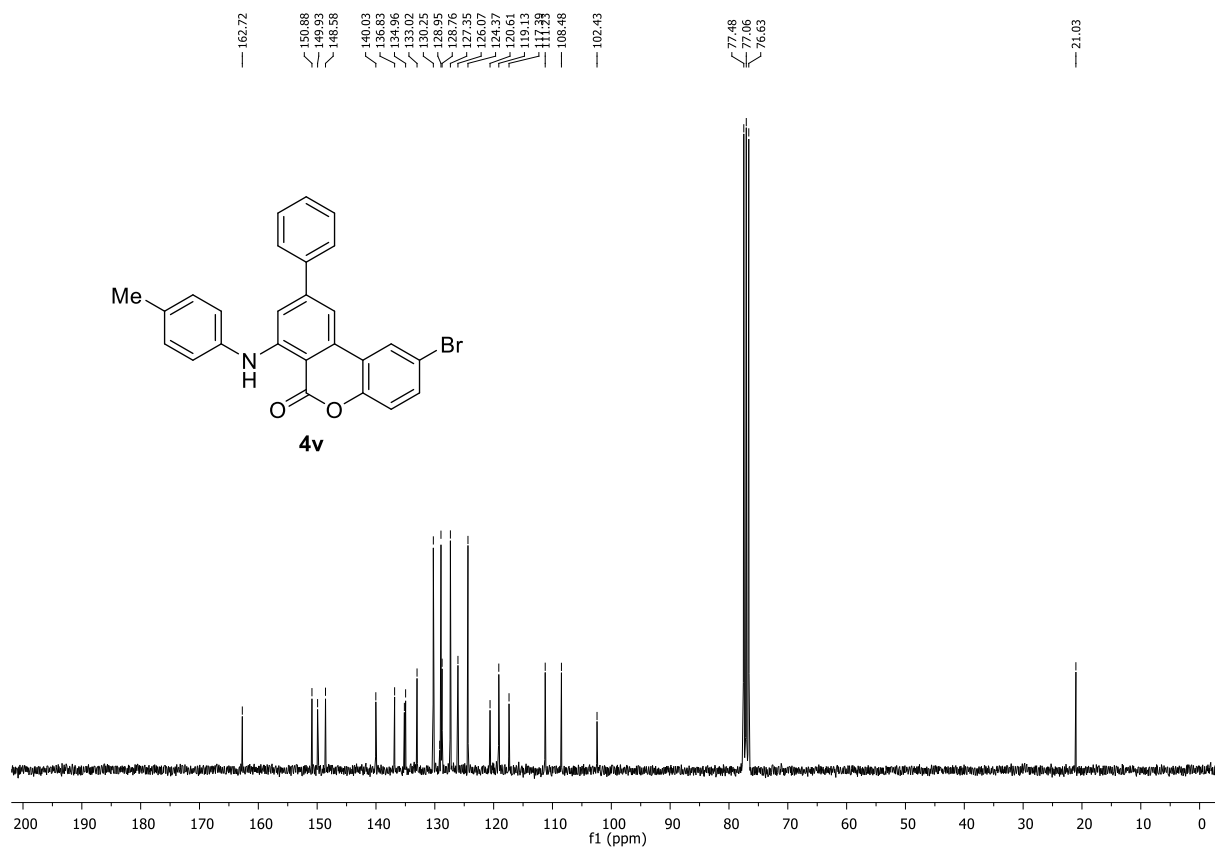

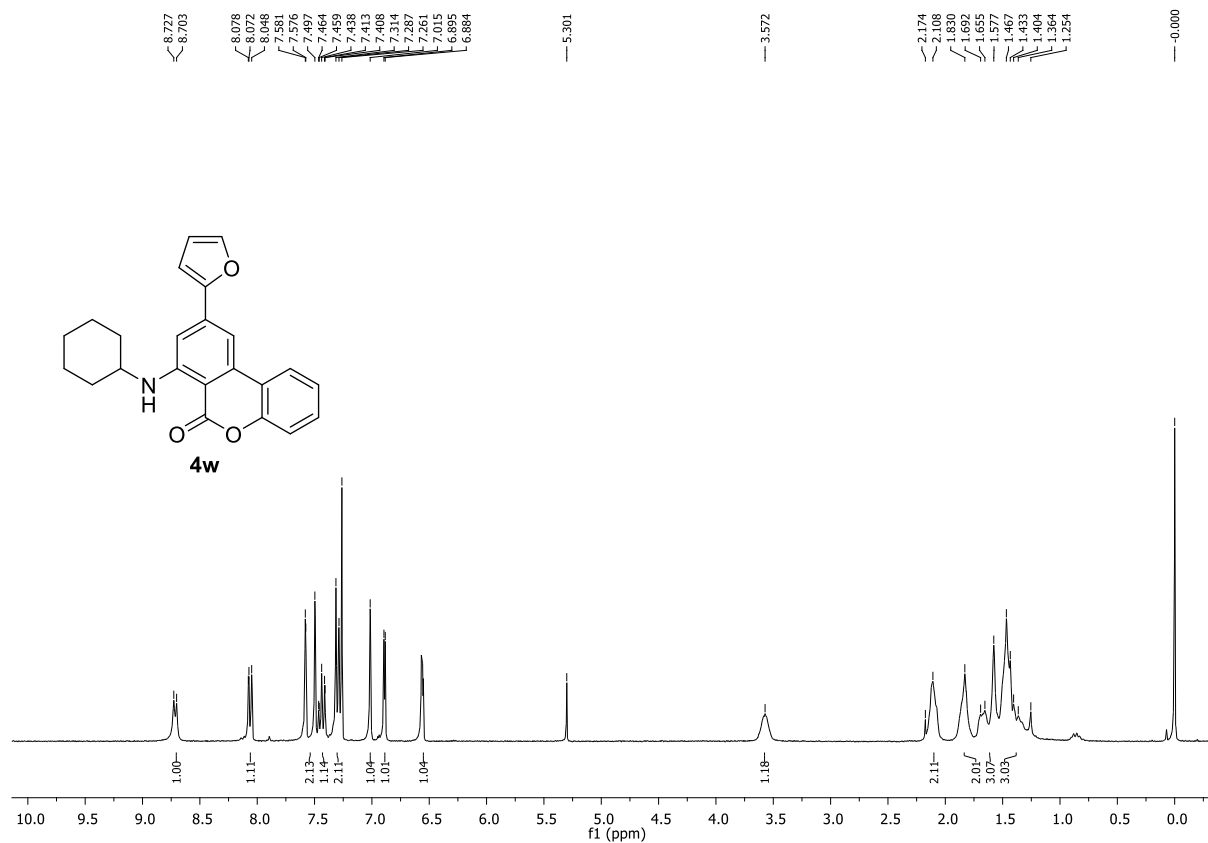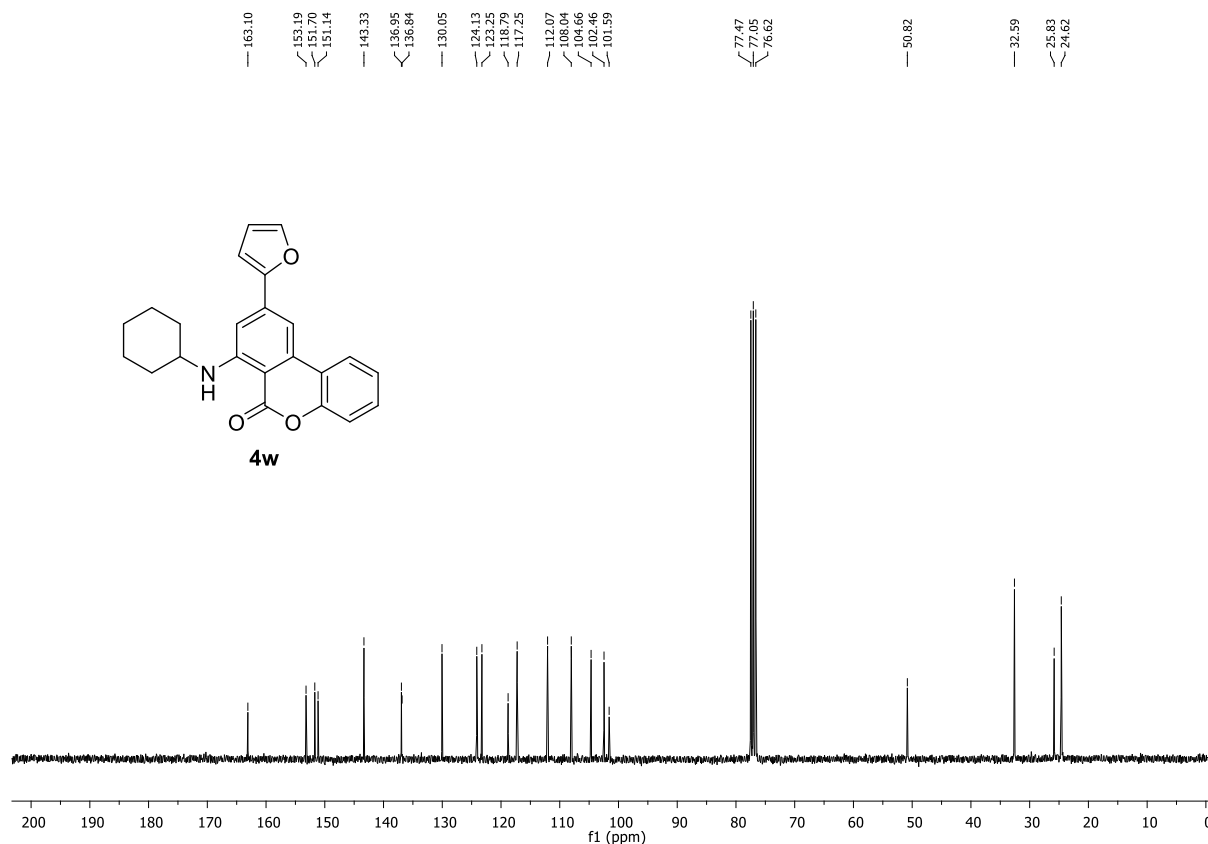



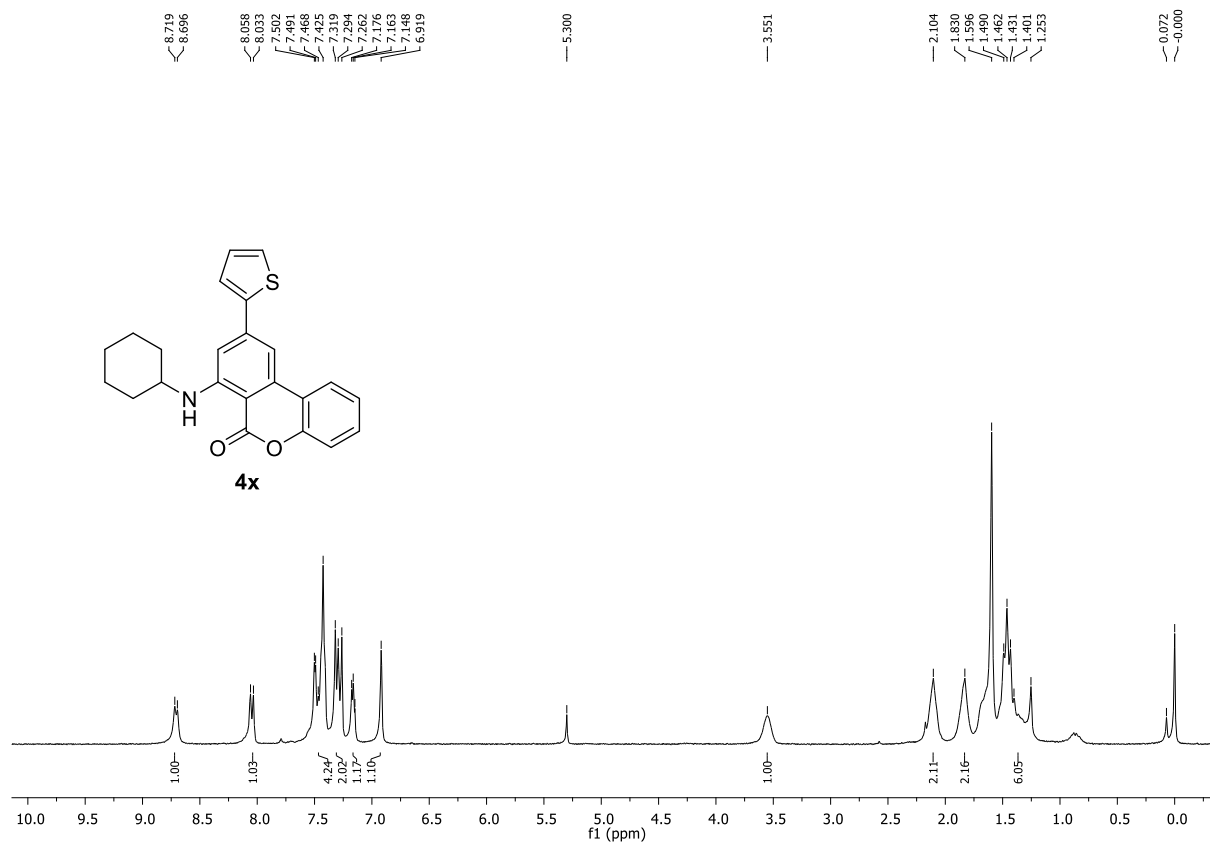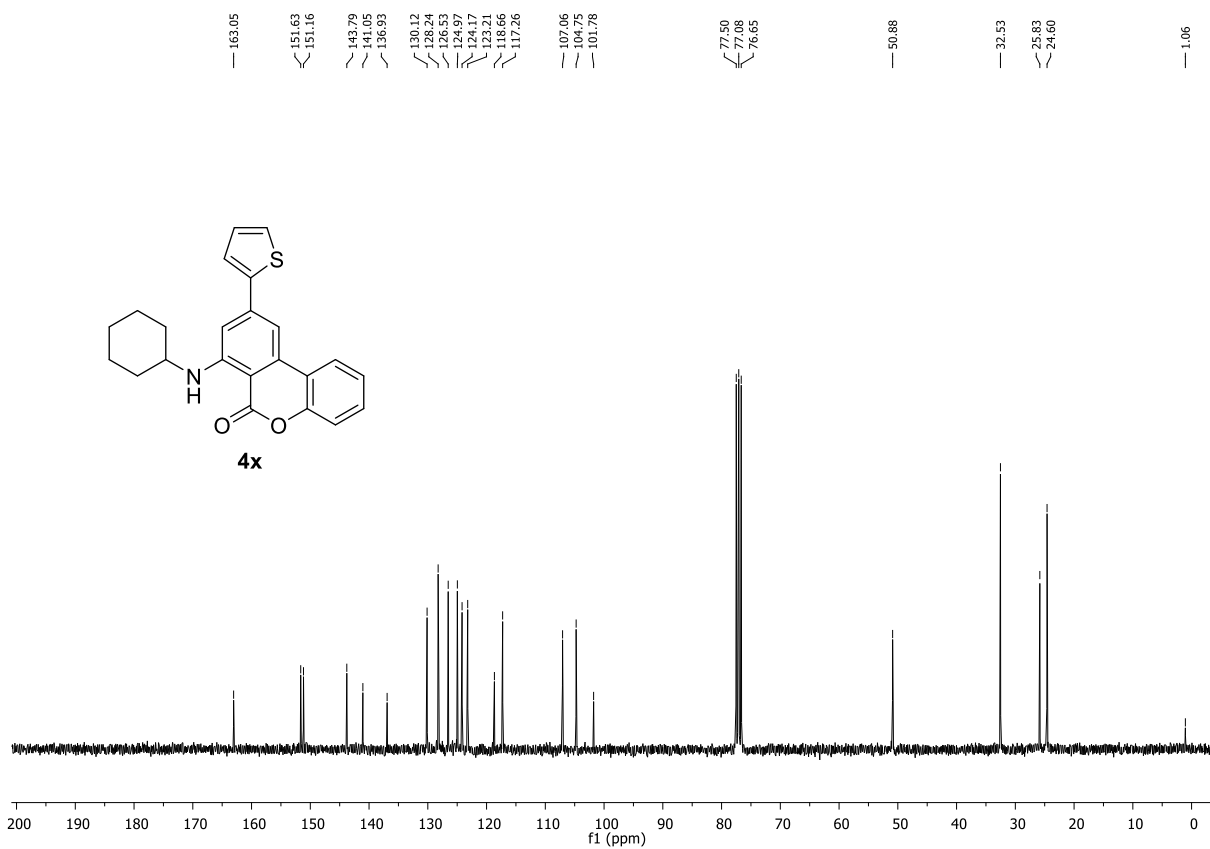

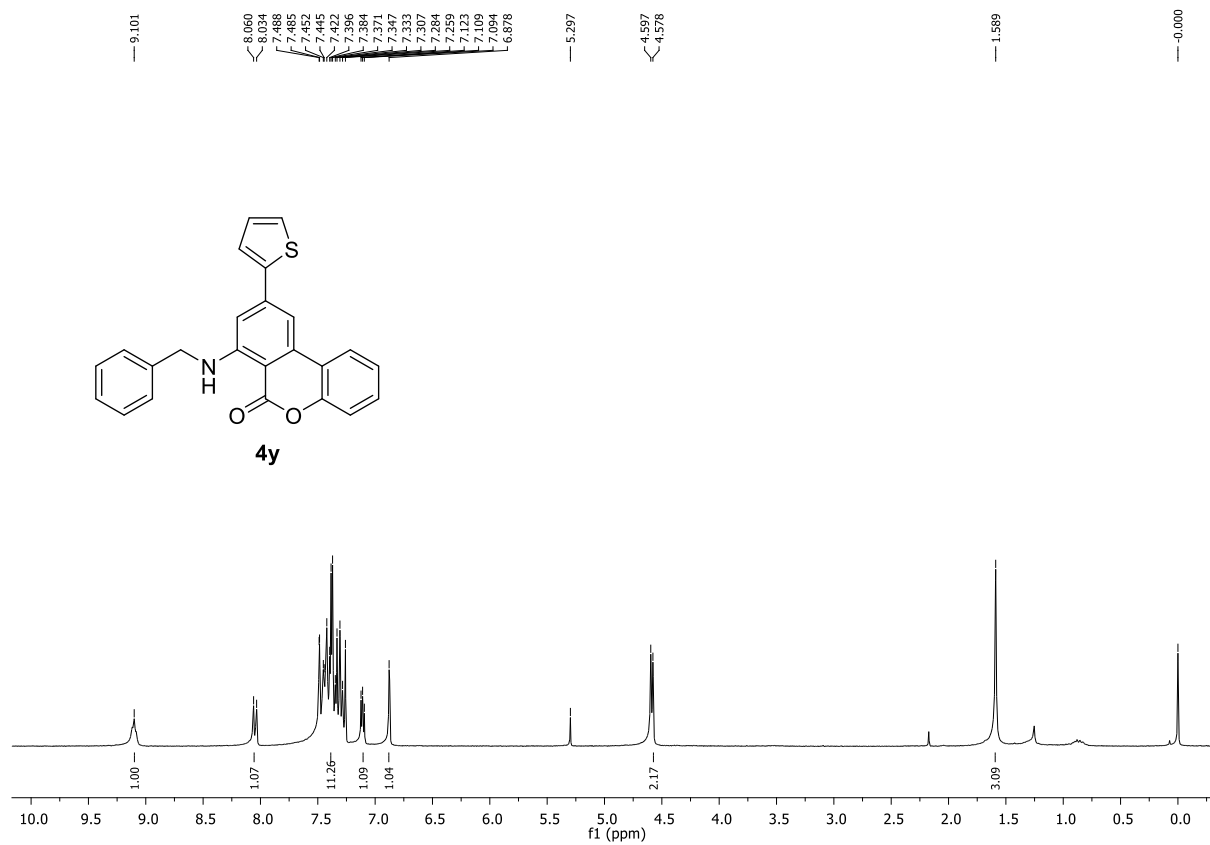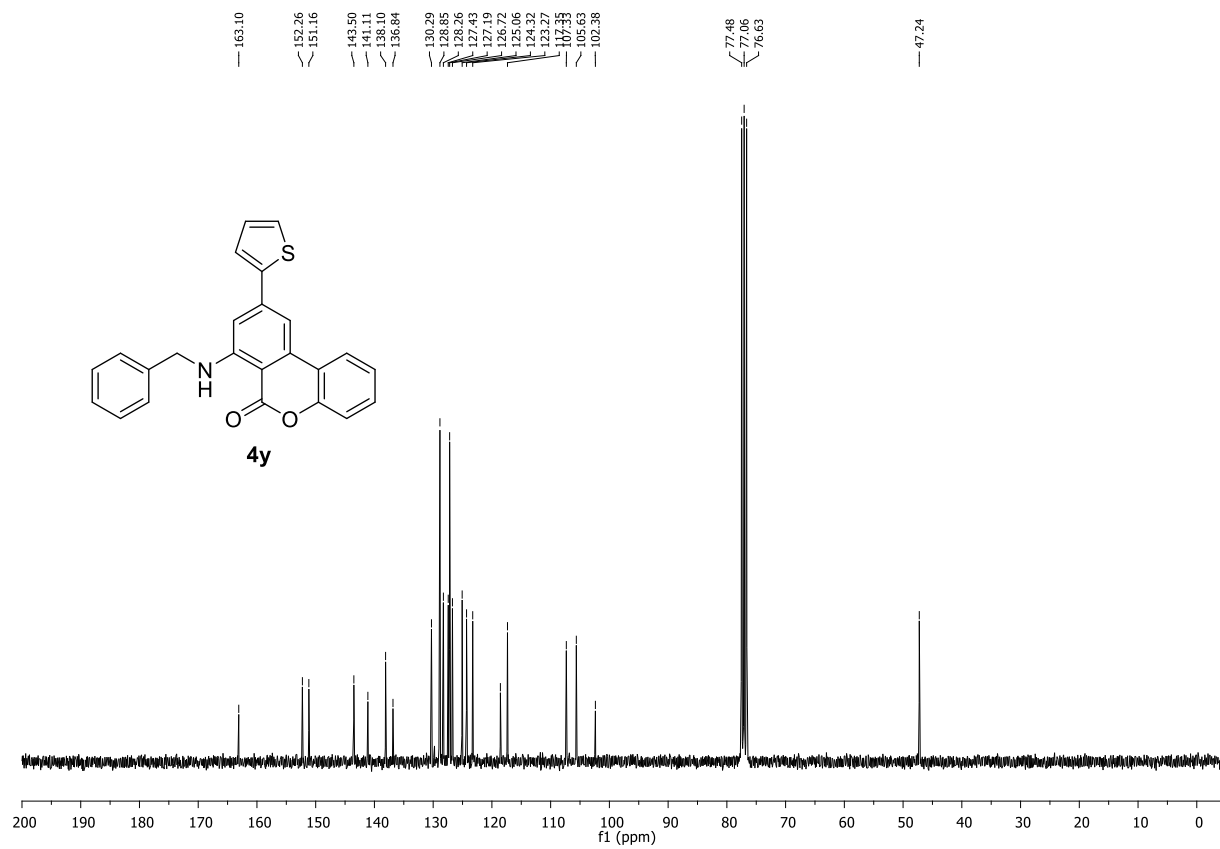

Supplement: c9ra07108c1.pdf [file c9ra07108c1.pdf]
